# Supplementary material for: Synthesis of SARS-CoV-2 Mpro inhibitors bearing a cinnamic ester warhead with in vitro activity against human coronaviruses
Source: Royal Society of Chemistry journal article supplement (doi:10.1039/d3ob00381g), 2023-01-01
Supplement: d3ob00381g1.pdf [file d3ob00381g1.pdf]

Supplementary materials for:

## Synthesis of SARS-CoV-2 M<sup>pro</sup> Inhibitors bearing a Cinnamic Ester Warhead with *In Vitro* Activity against Human Coronaviruses

Andrea Citarella,<sup>\*a</sup> Davide Moi,<sup>\*b</sup> Martina Pedrini,<sup>a</sup> Helena Pérez-Peña,<sup>a</sup> Stefano Pieraccini,<sup>a</sup> Alessandro Dimasi,<sup>a</sup> Claudio Stagno,<sup>c</sup> Nicola Micale,<sup>c</sup> Tanja Schirmeister,<sup>d</sup> Giulia Sibille,<sup>e</sup> Giorgio Gribaudo,<sup>e</sup> Alessandra Silvani,<sup>a</sup> Clelia Giannini<sup>a</sup> and Daniele Passarella<sup>\*a</sup>

<sup>a</sup>Department of Chemistry, University of Milan, Via Golgi 19, 20133, Milano, Italy

<sup>b</sup>Dipartimento di Scienze Chimiche e Geologiche, Università di Cagliari, Cittadella Universitaria - S.S. 554 bivio per Sestu, 09042, Monserrato (CA), Italy

<sup>c</sup>Department of Chemical, Biological, Pharmaceutical and Environmental Sciences, University of Messina, Viale Ferdinando Stagno D'Alcontres 31, I-98166, Messina, Italy

<sup>d</sup>Department of Medicinal Chemistry, Institute of Pharmaceutical and Biomedical Sciences, Johannes Gutenberg University, Staudinger Weg 5, 55128 Mainz, Germany

<sup>e</sup>Department of Life Sciences and Systems Biology, University of Turin, Via Accademia Albertina 13, 10123, Torino, Italy

### Table of contents

---

|    |                                                  |         |
|----|--------------------------------------------------|---------|
| 1. | <sup>1</sup> H- and <sup>13</sup> C- NMR Spectra | 1 - 14  |
| 2. | HPLC traces of the final compounds               | 15 - 20 |
| 3. | Figure S1                                        | 21      |
| 4. | Figure S2                                        | 22      |
| 5. | Table S1                                         | 23      |

# 1. <sup>1</sup>H- and <sup>13</sup>C- Spectra of the Compounds

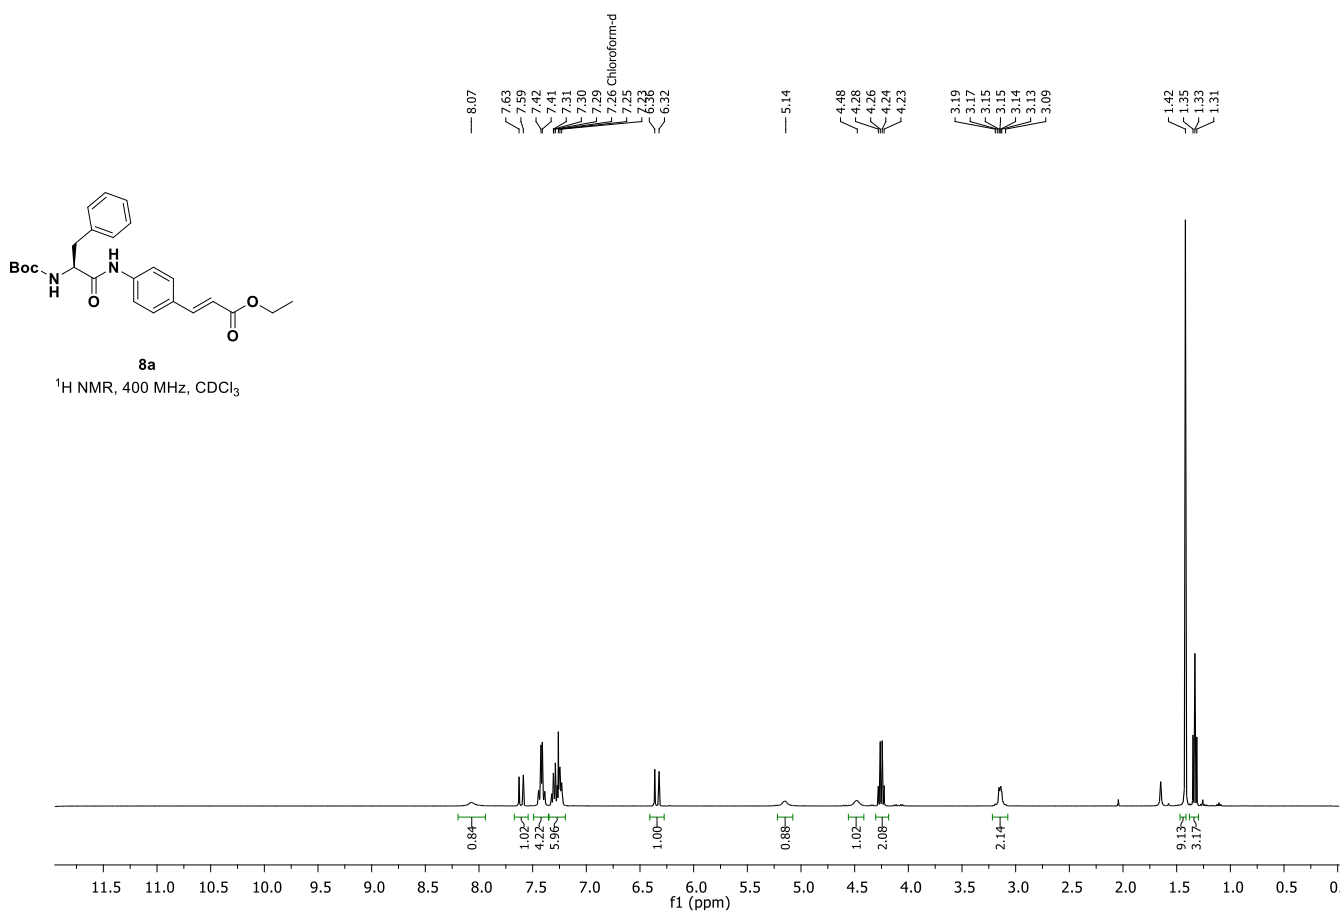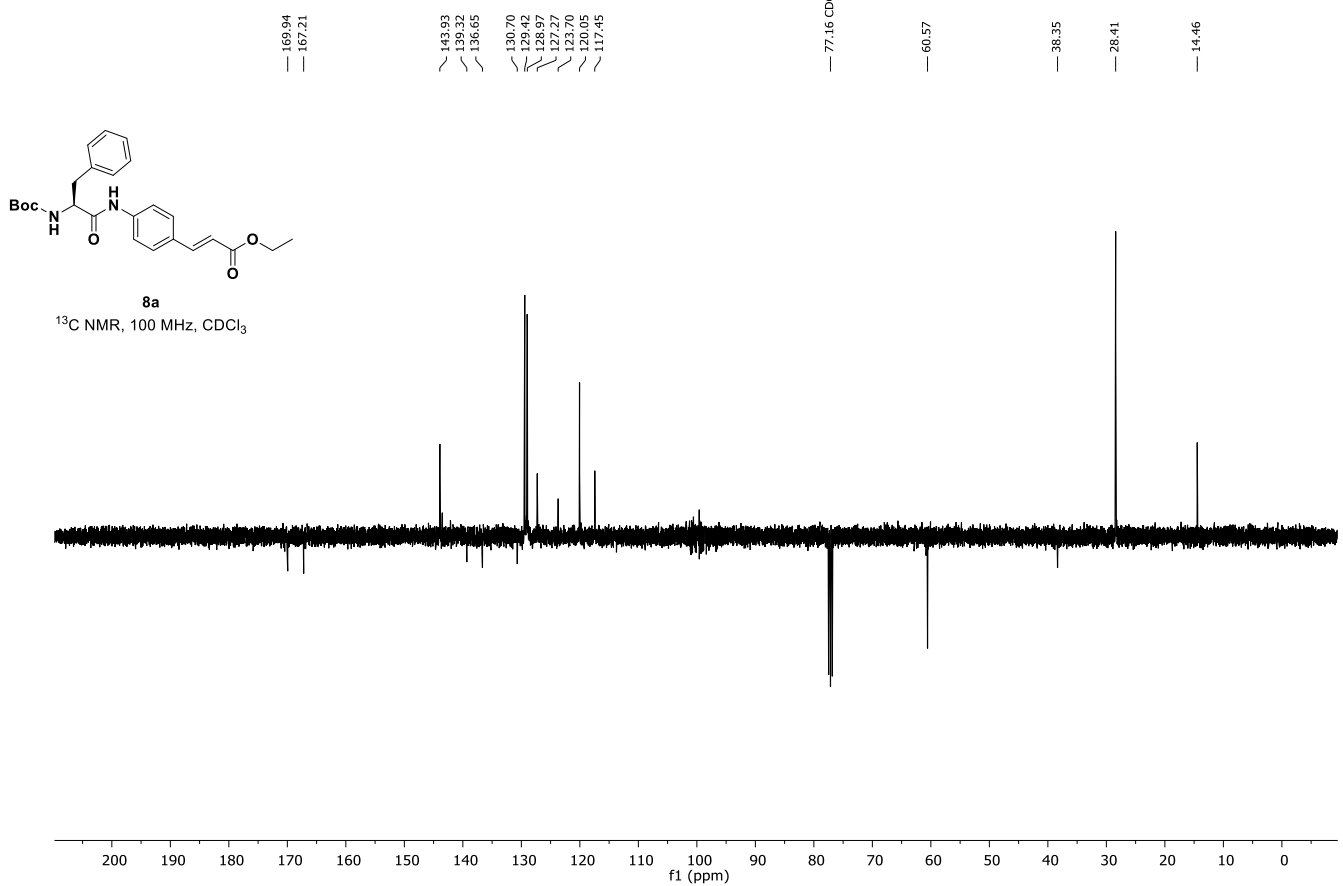

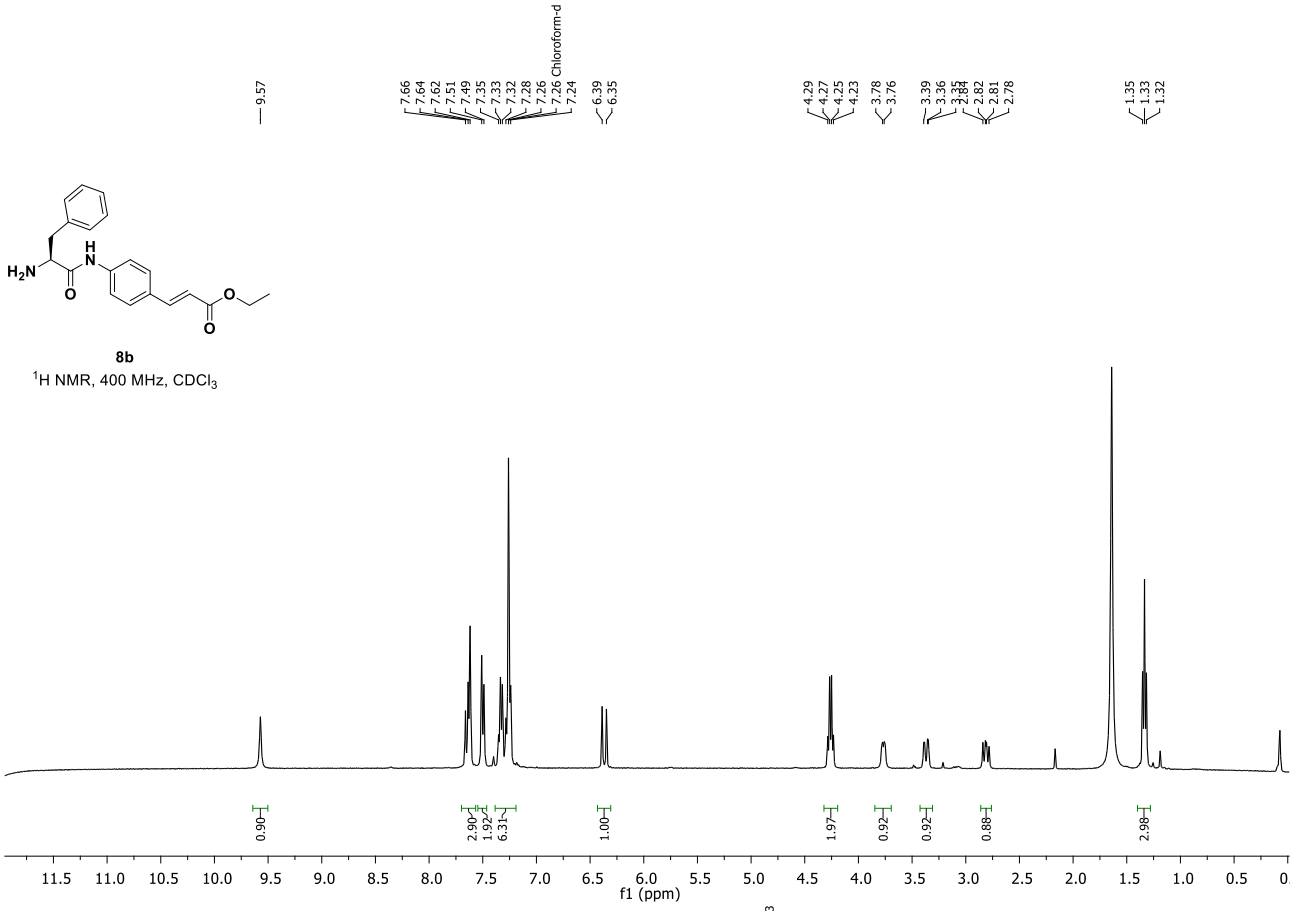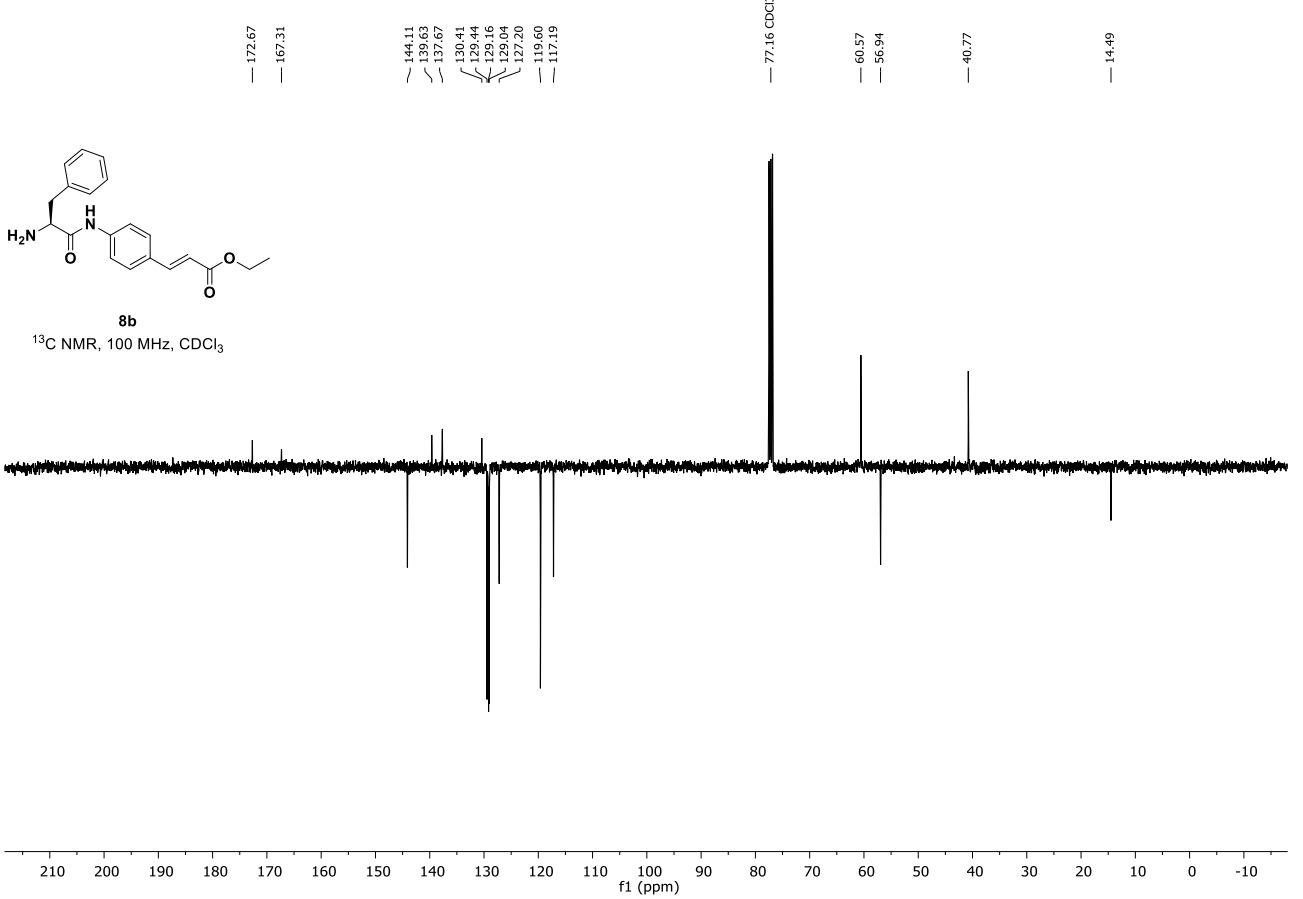

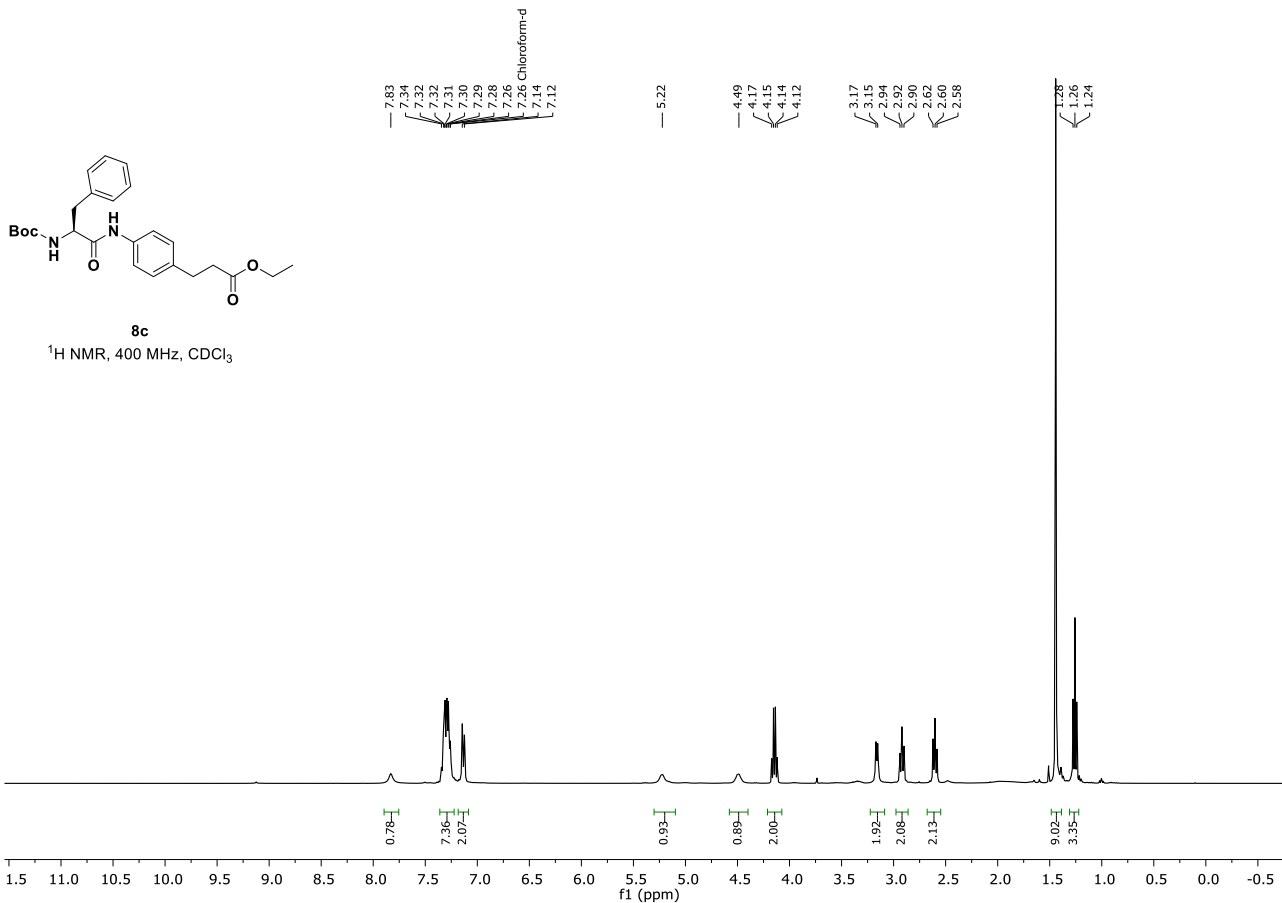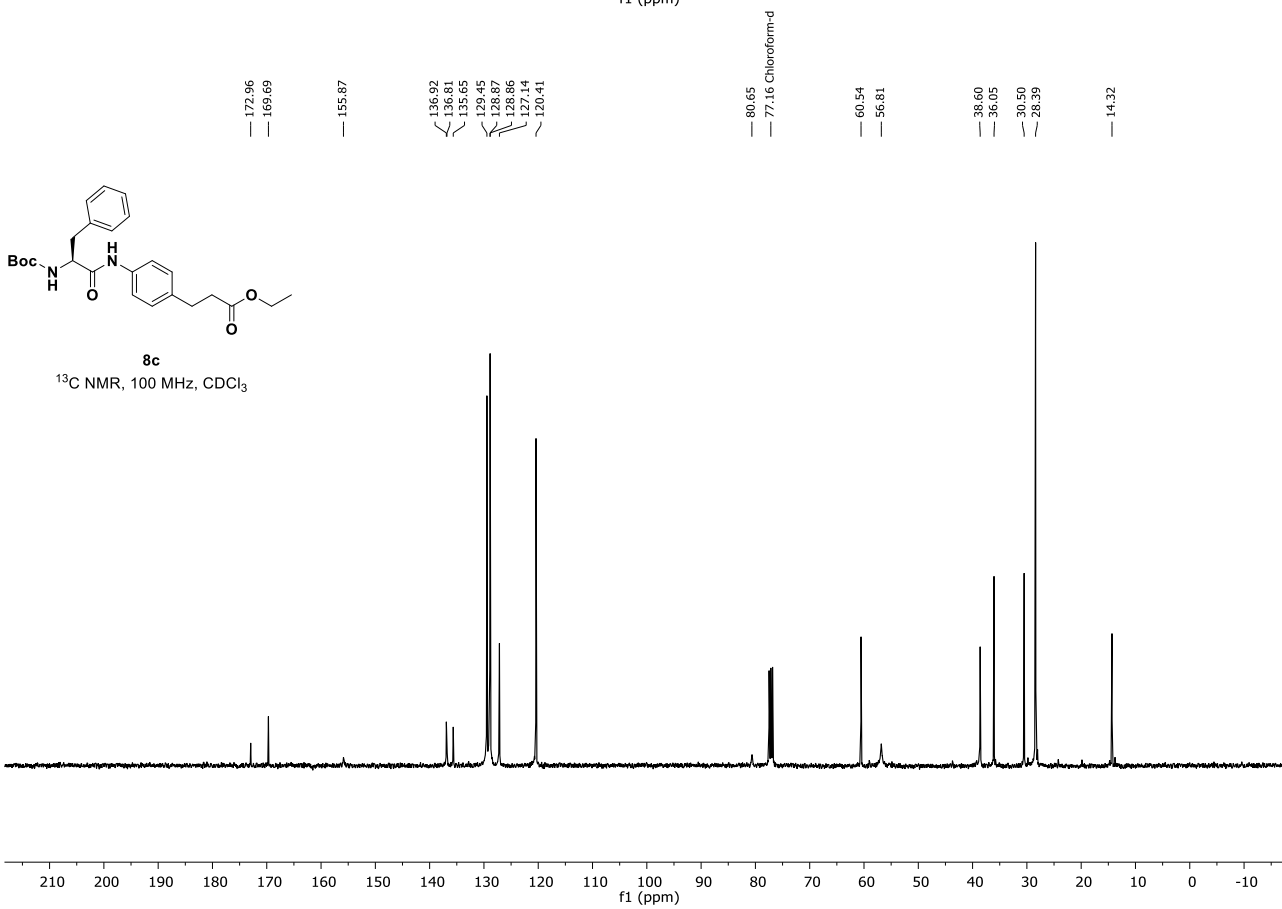

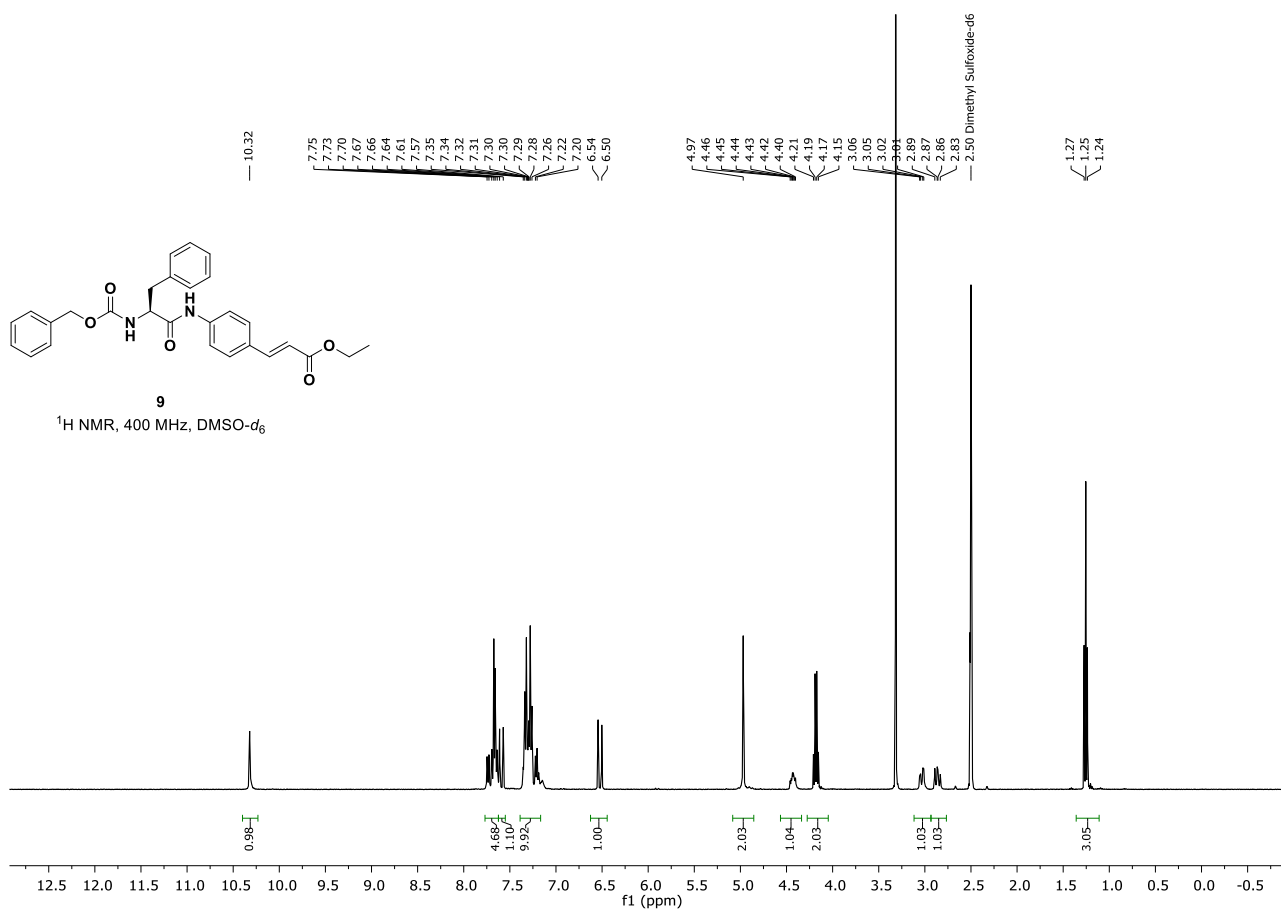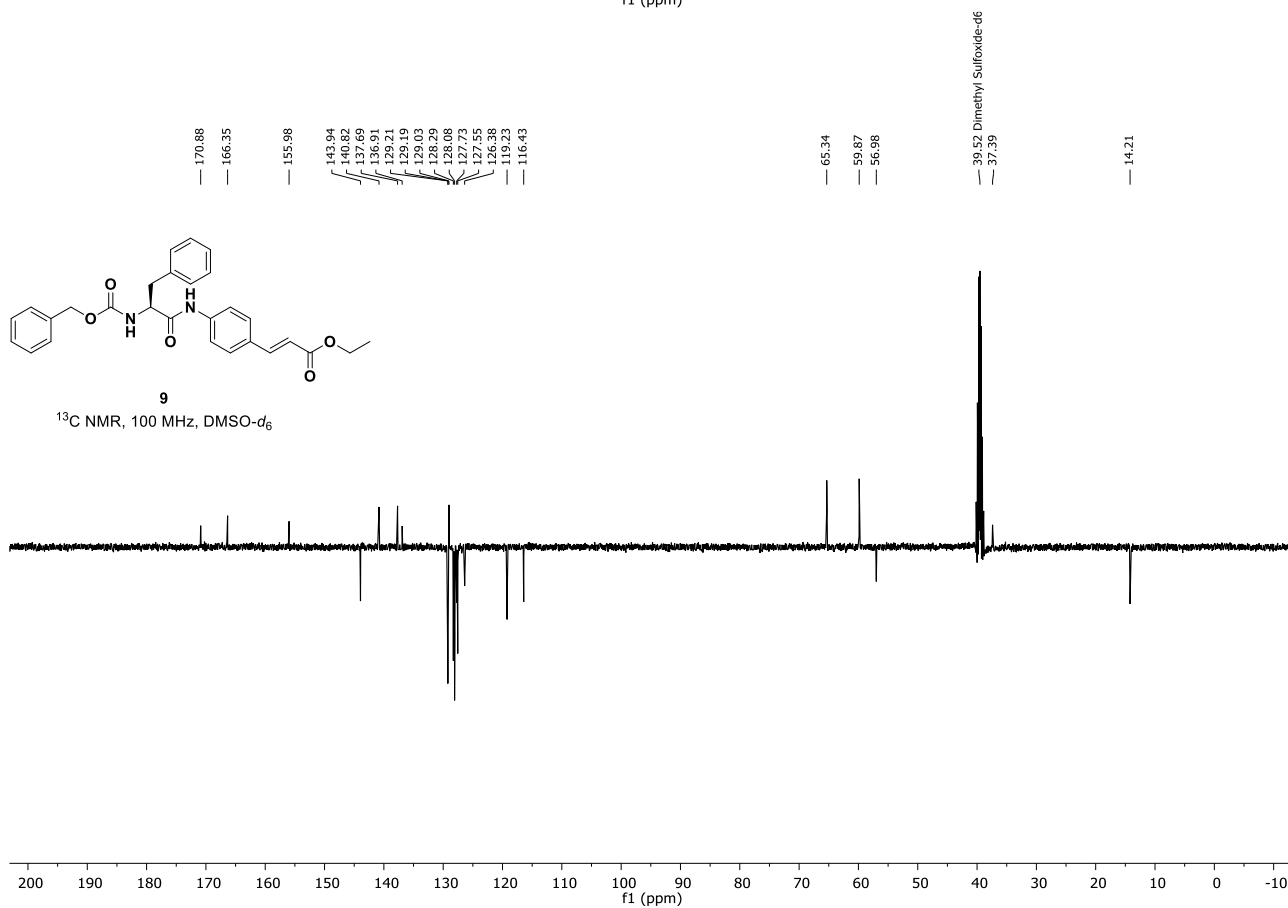

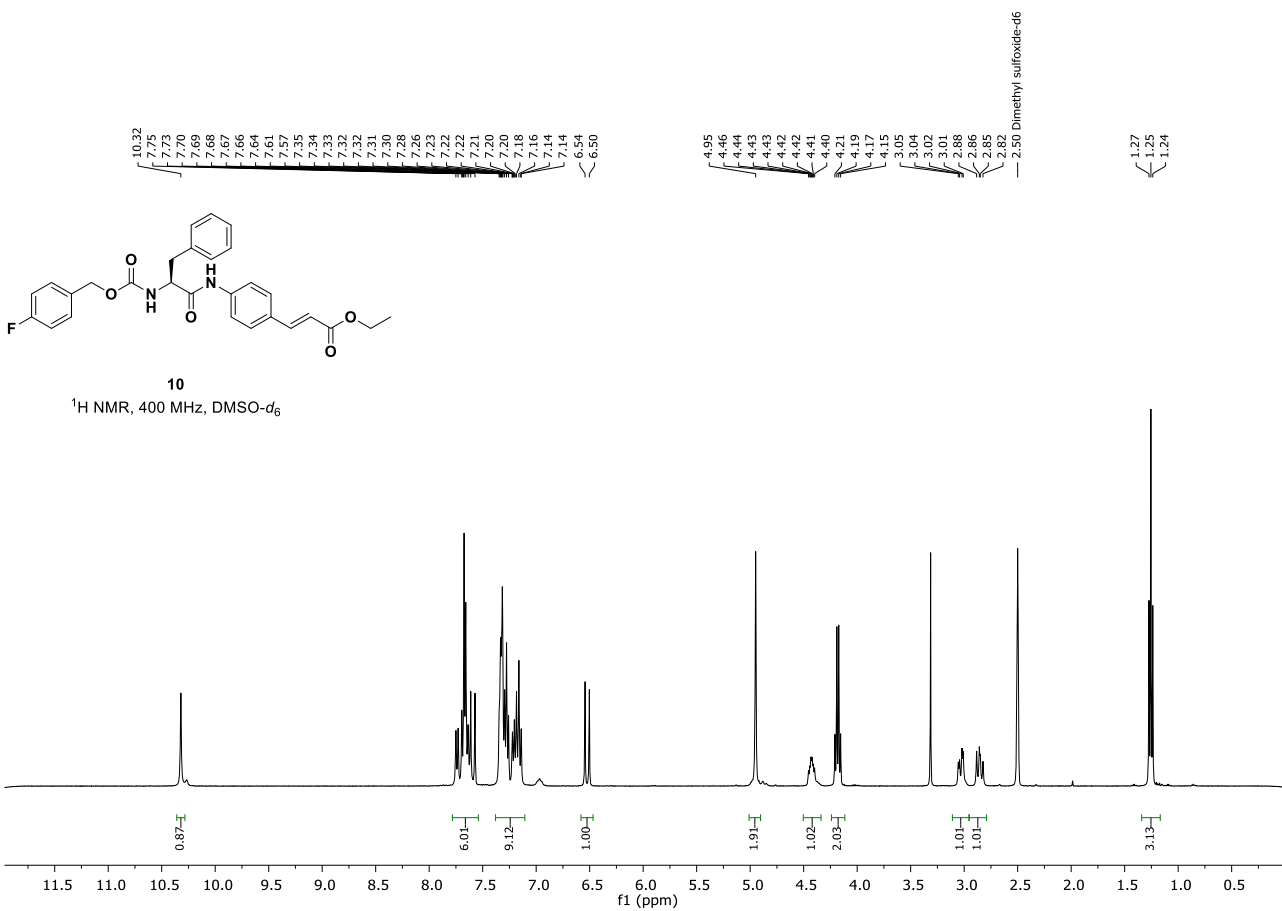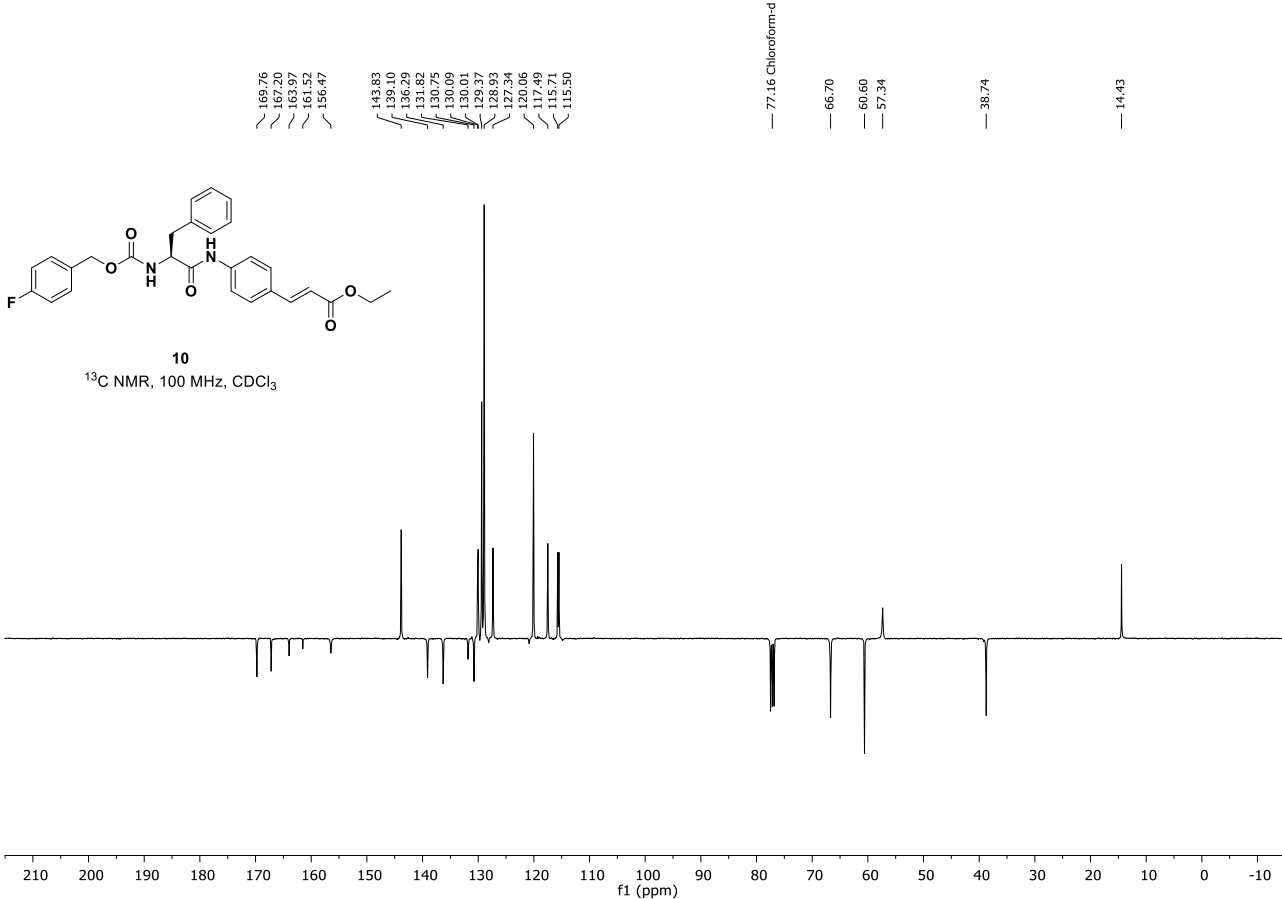



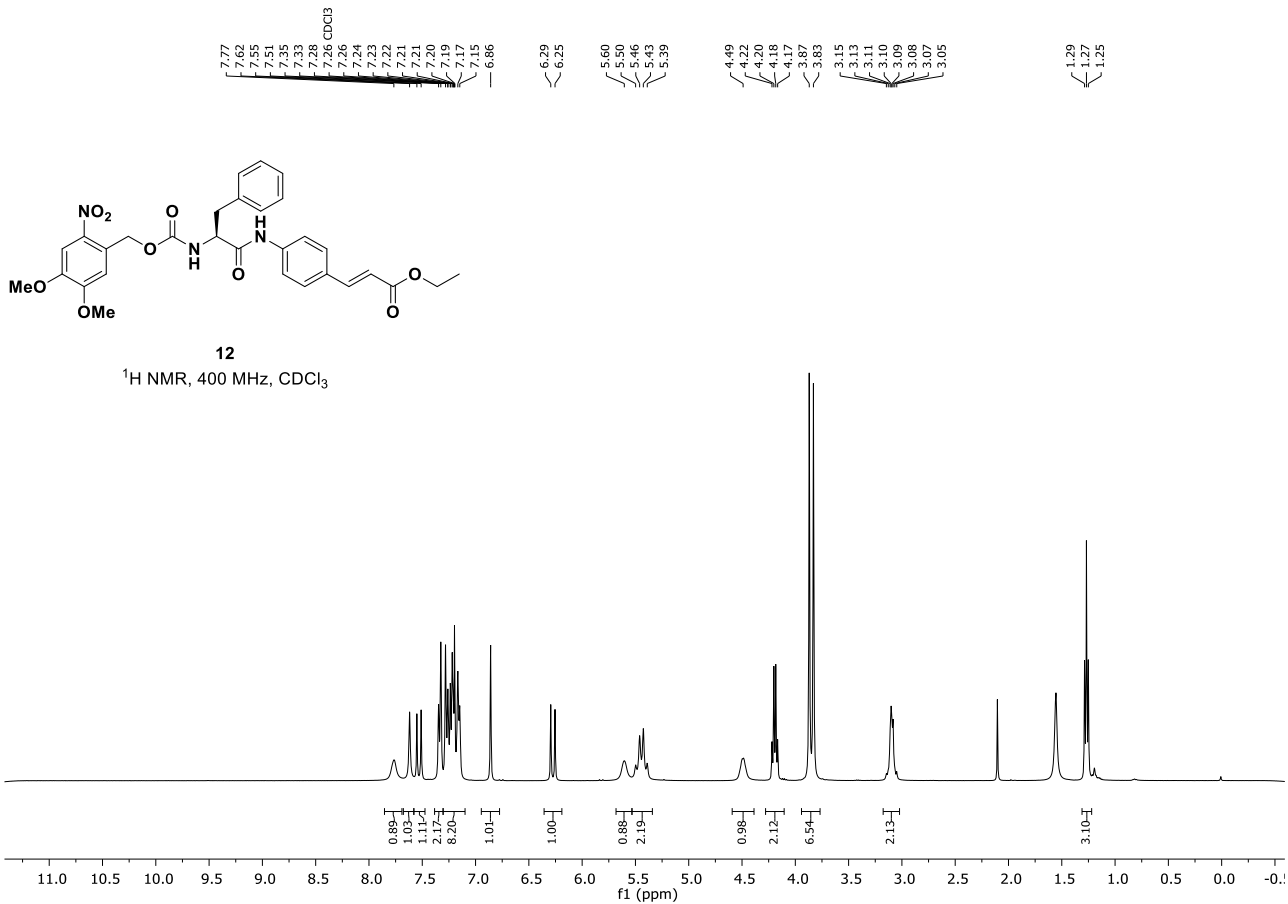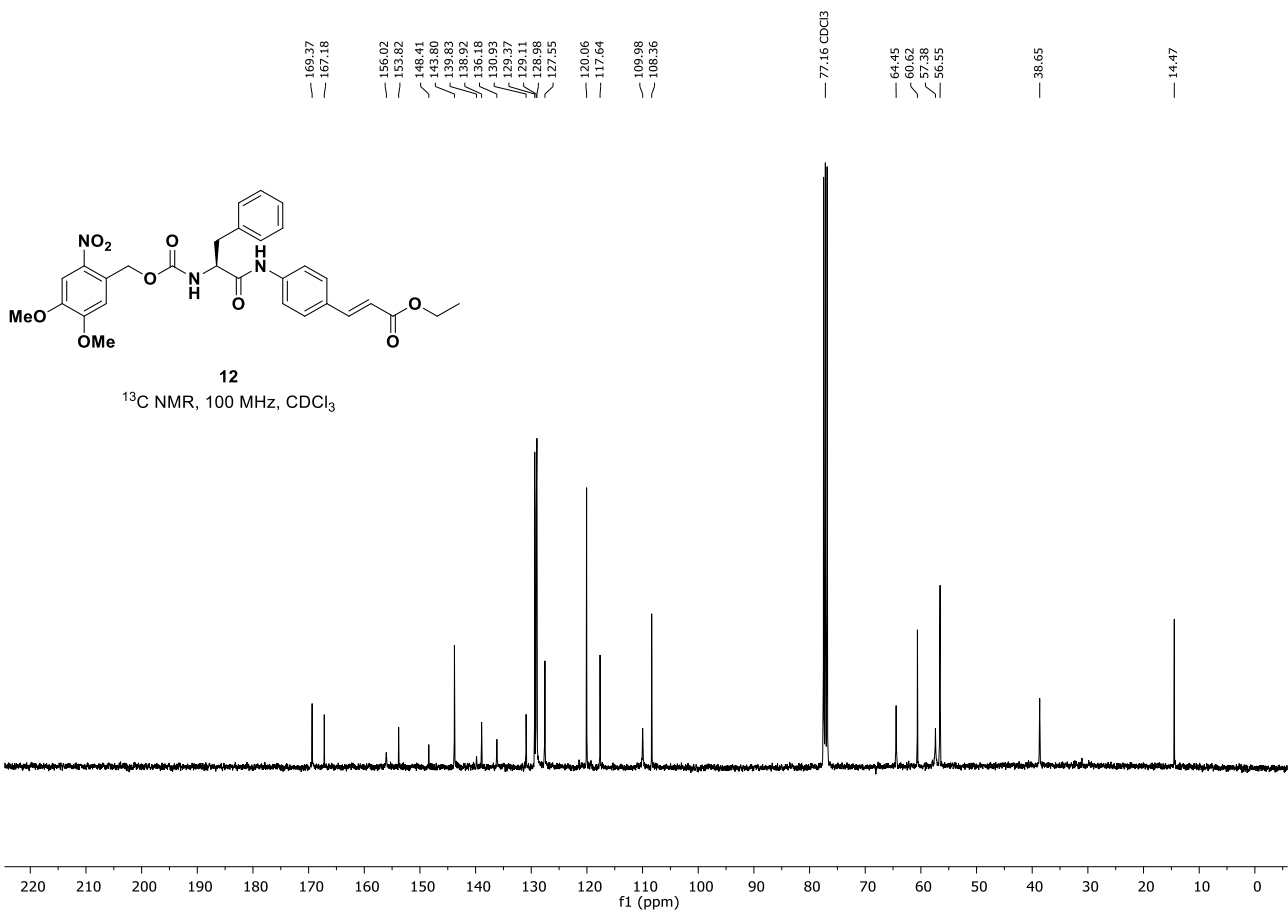



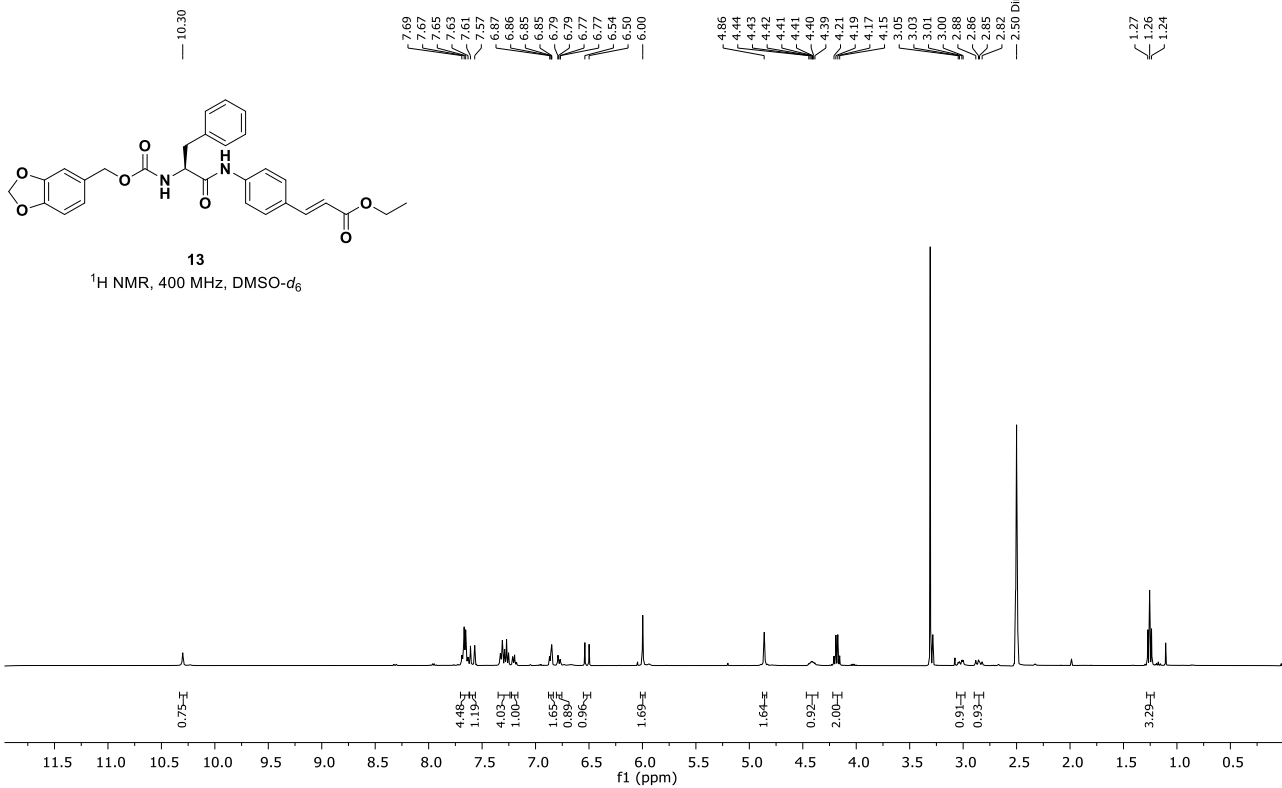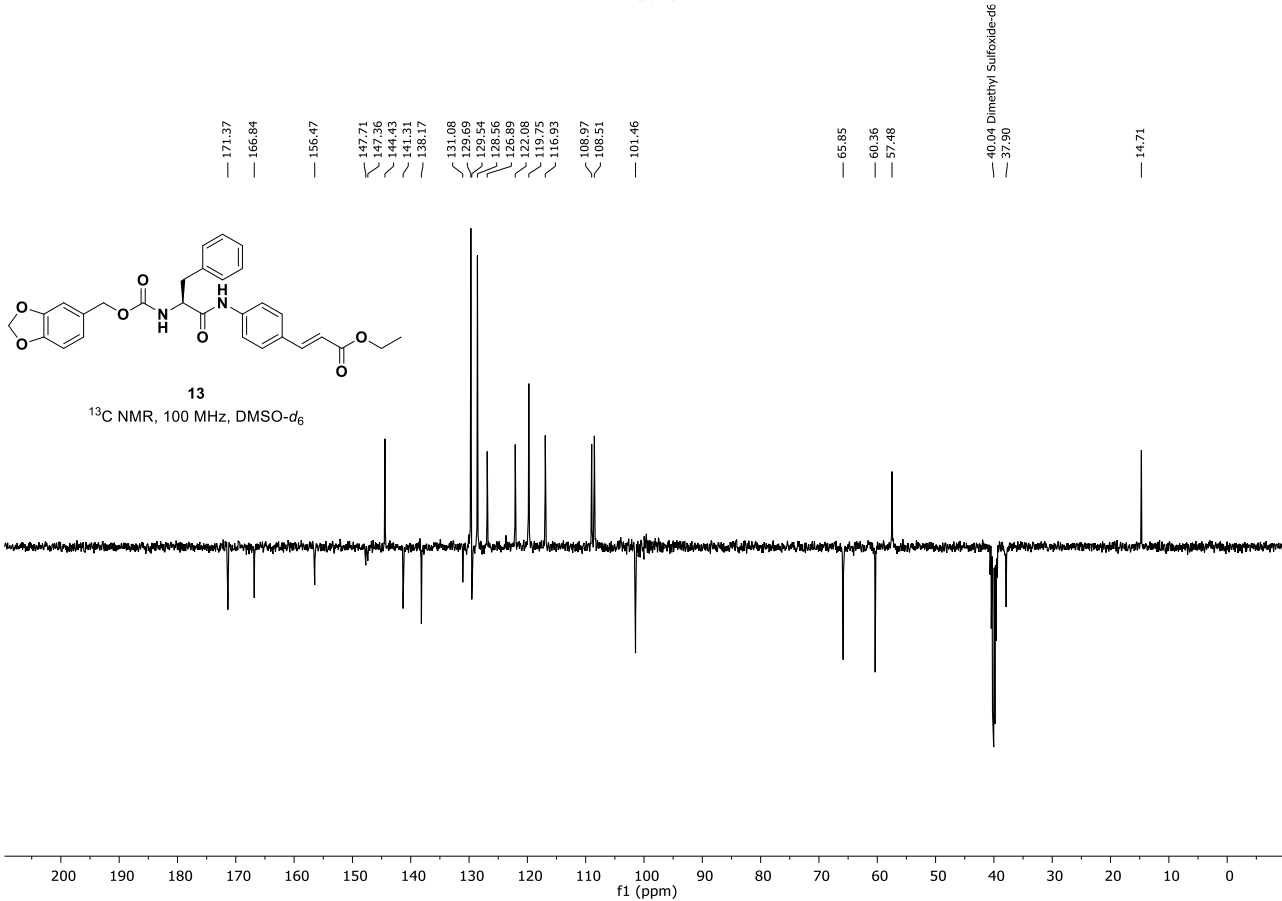

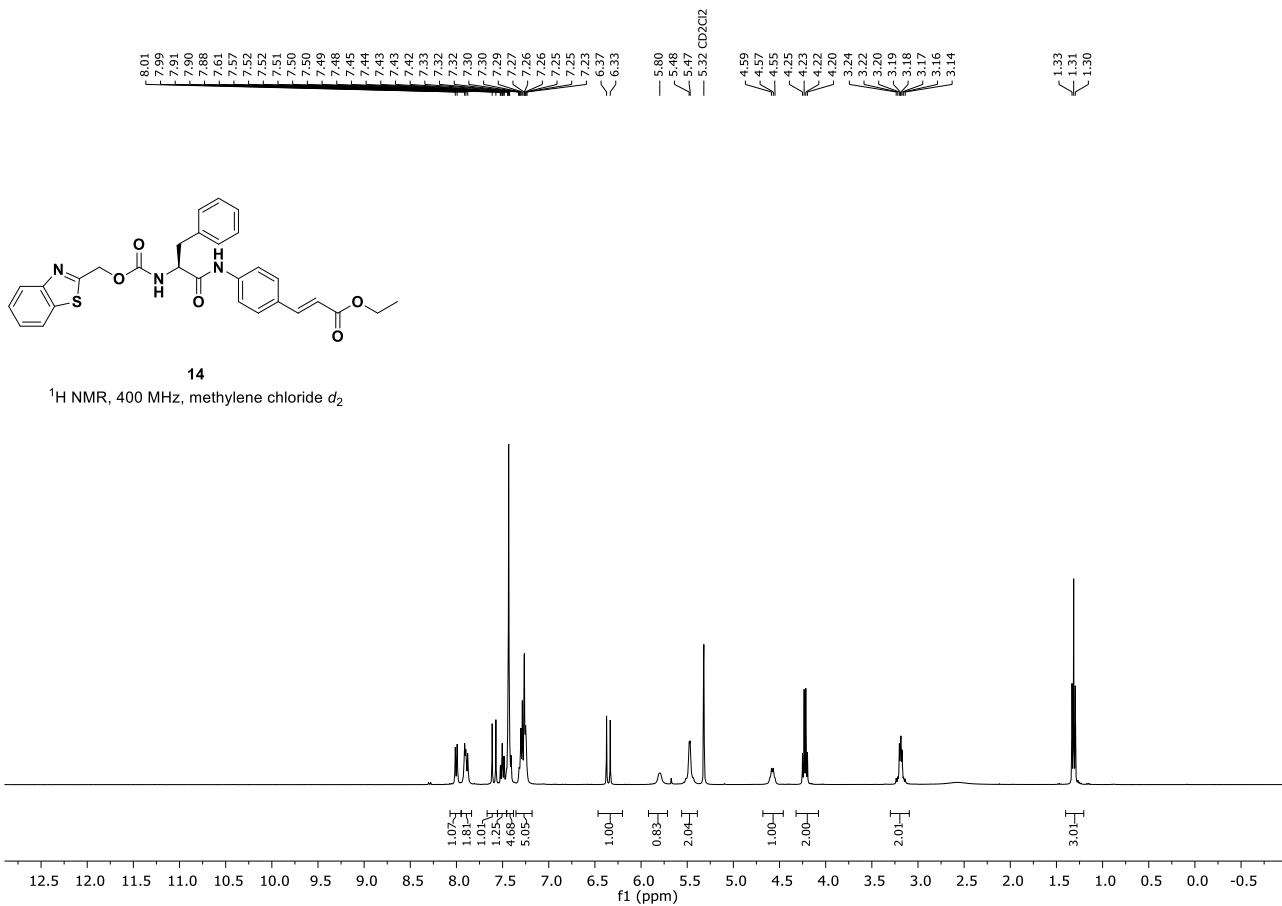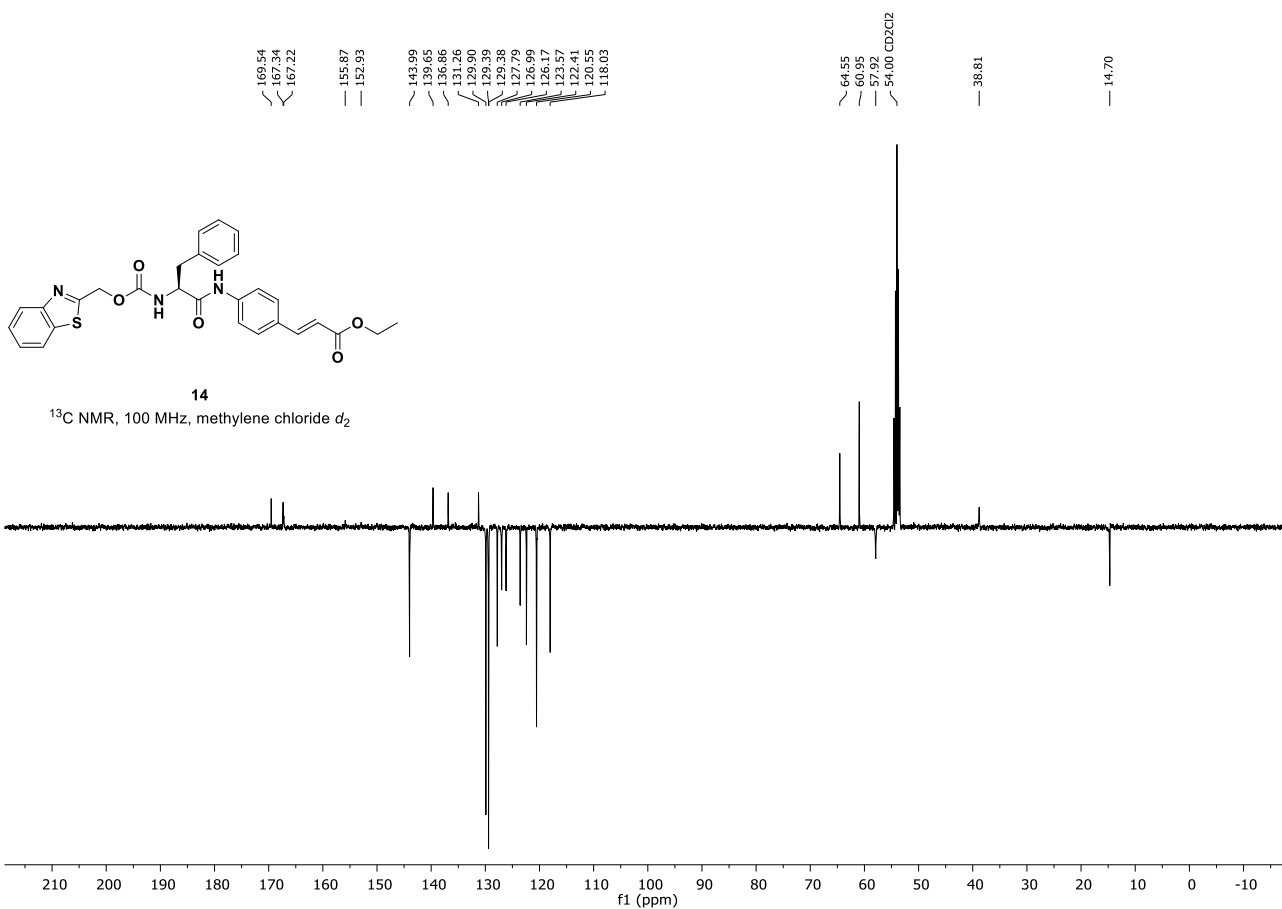

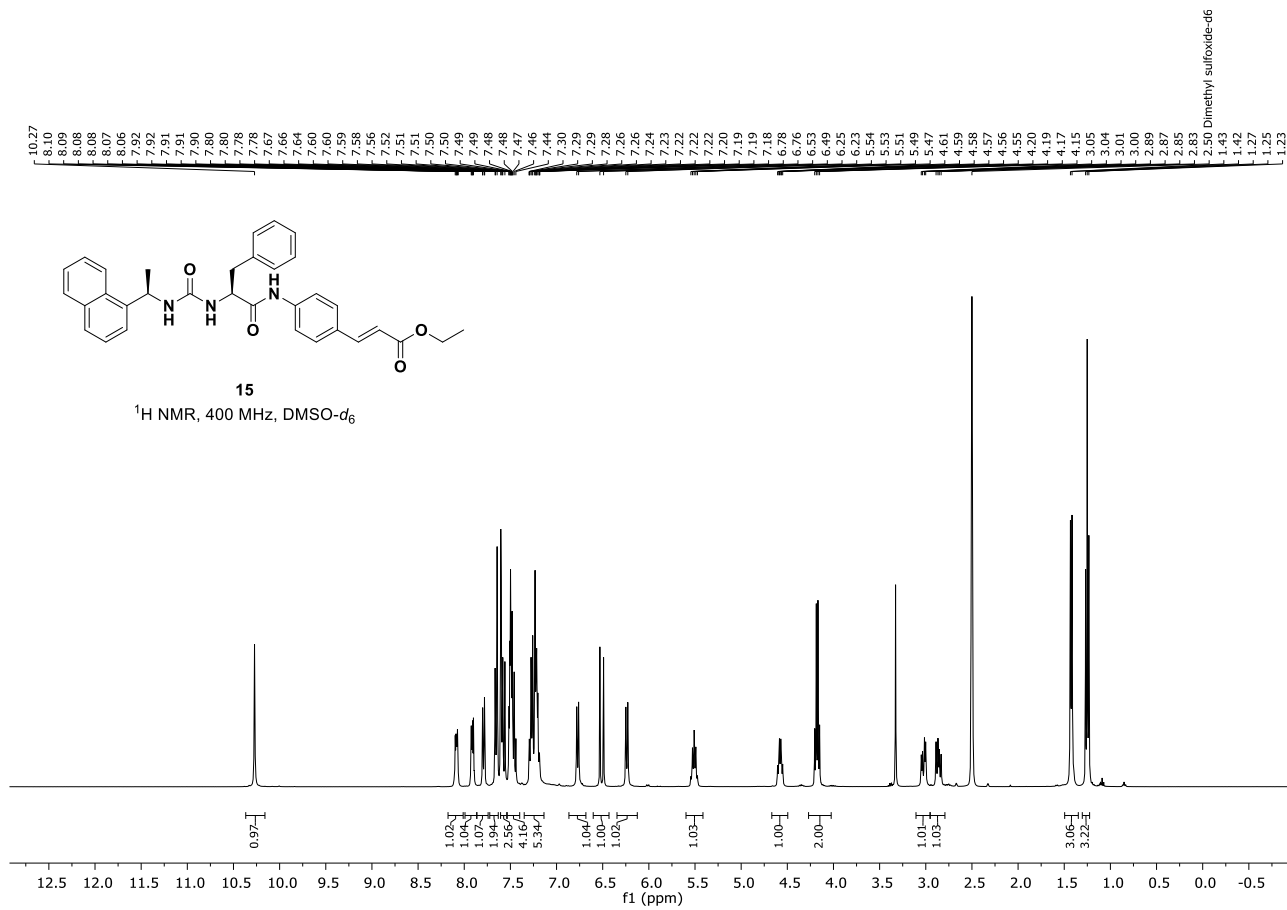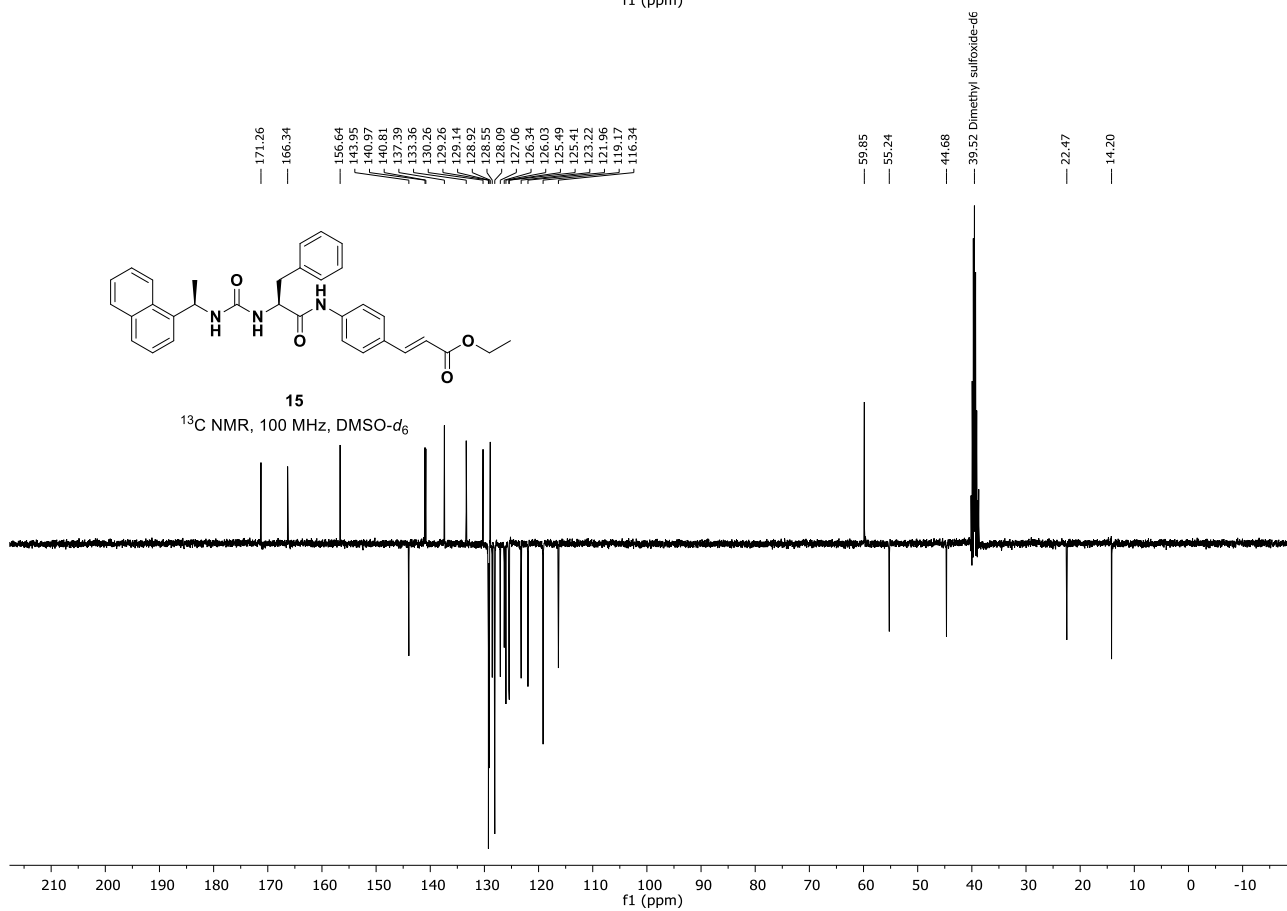

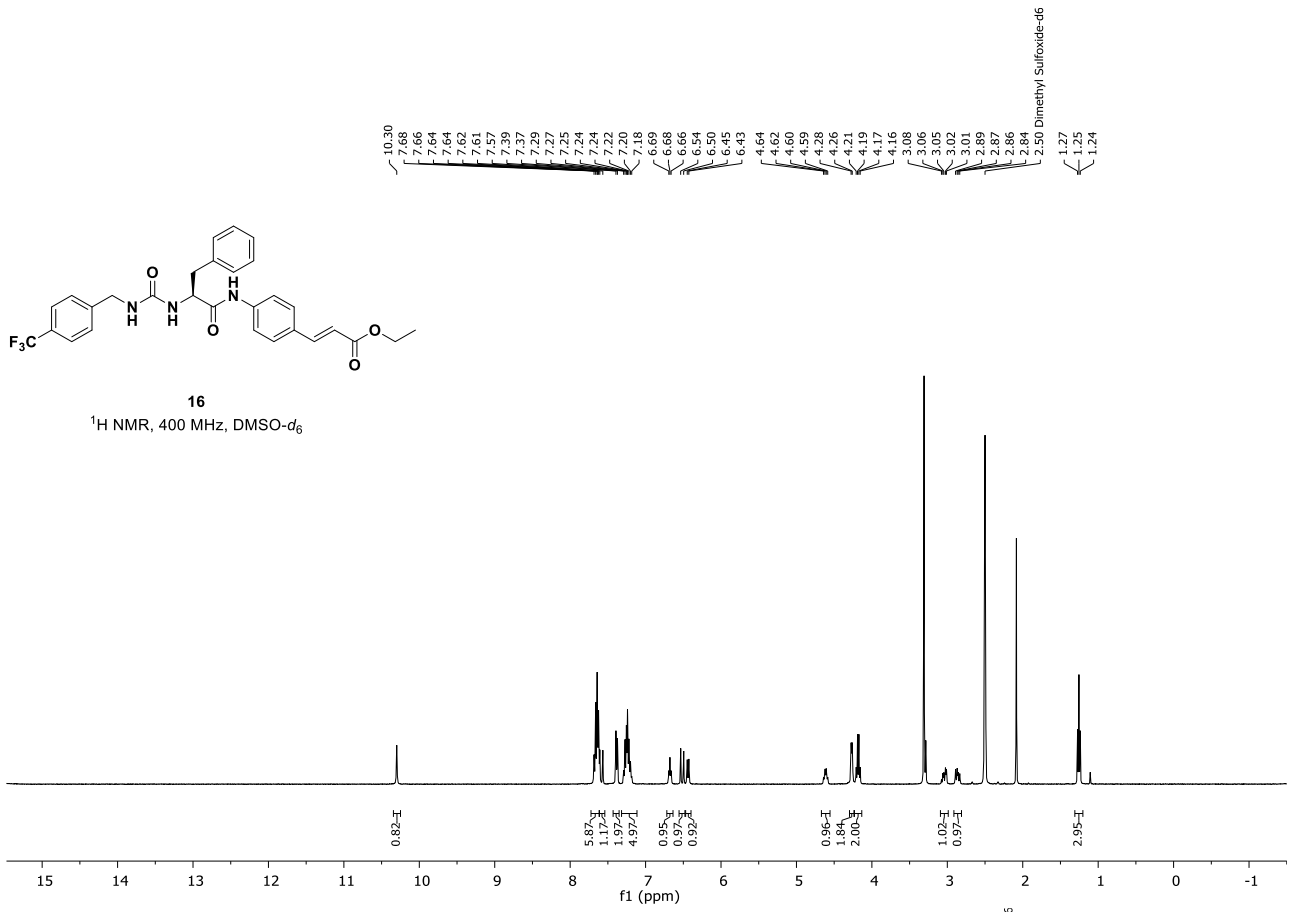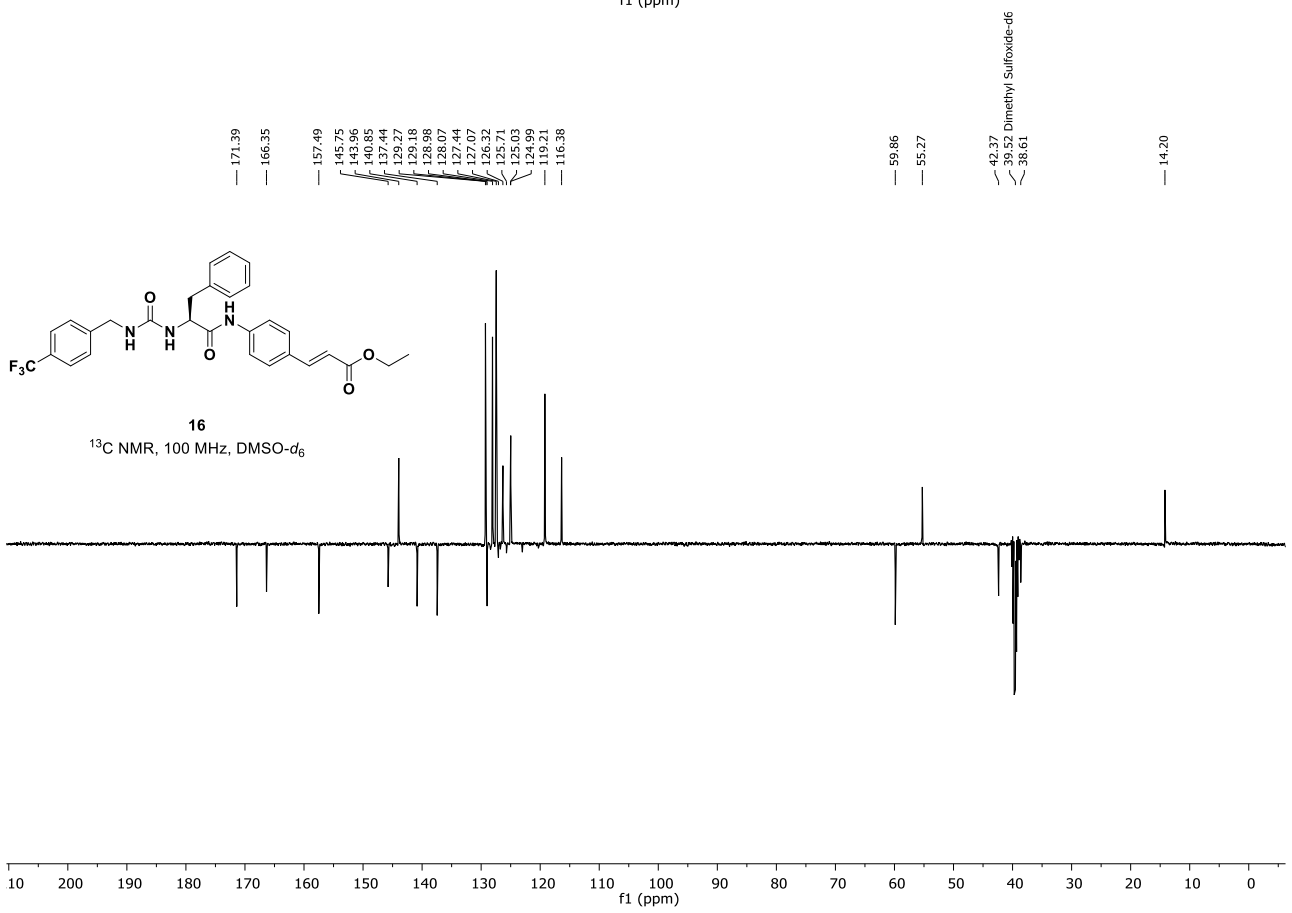

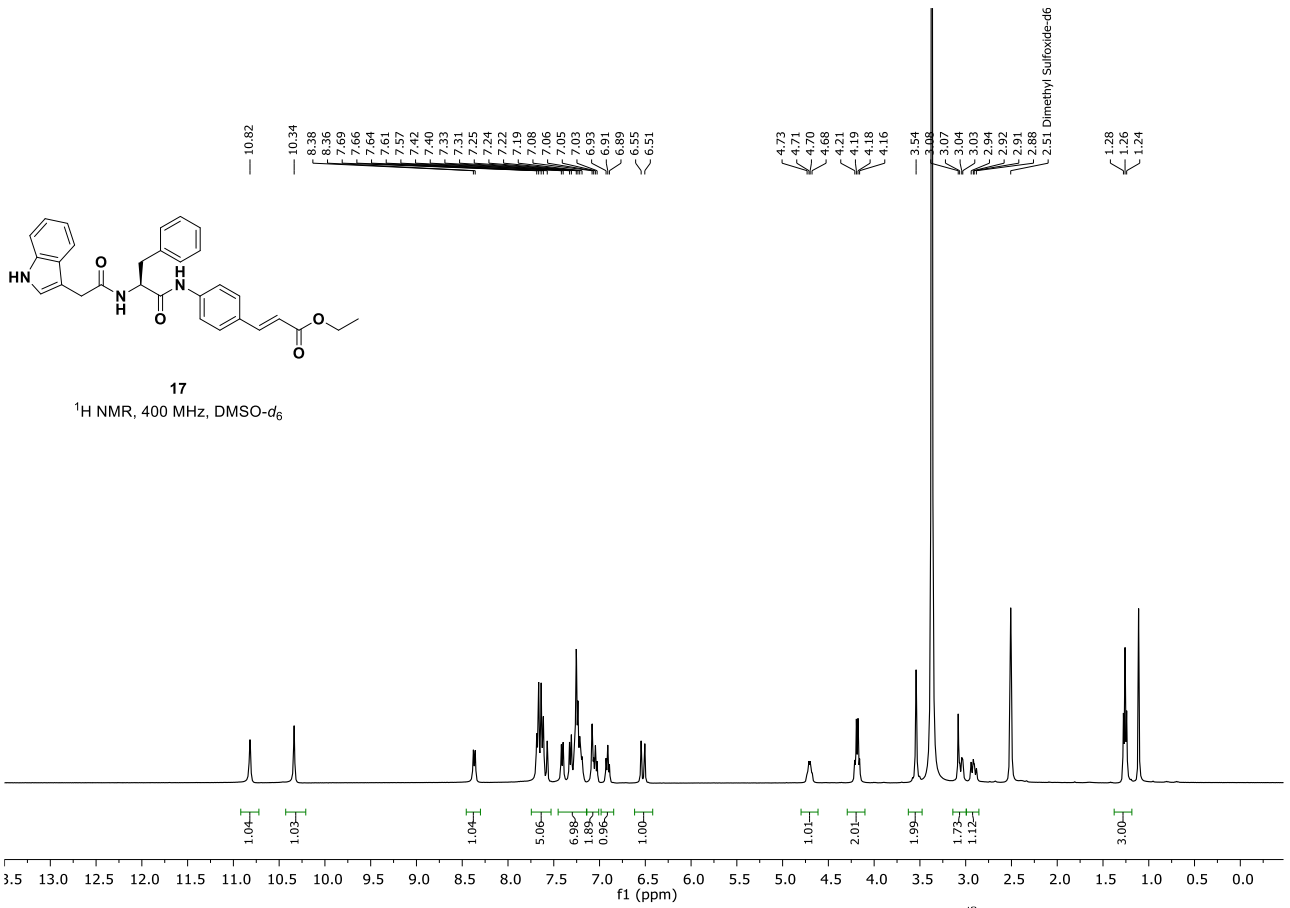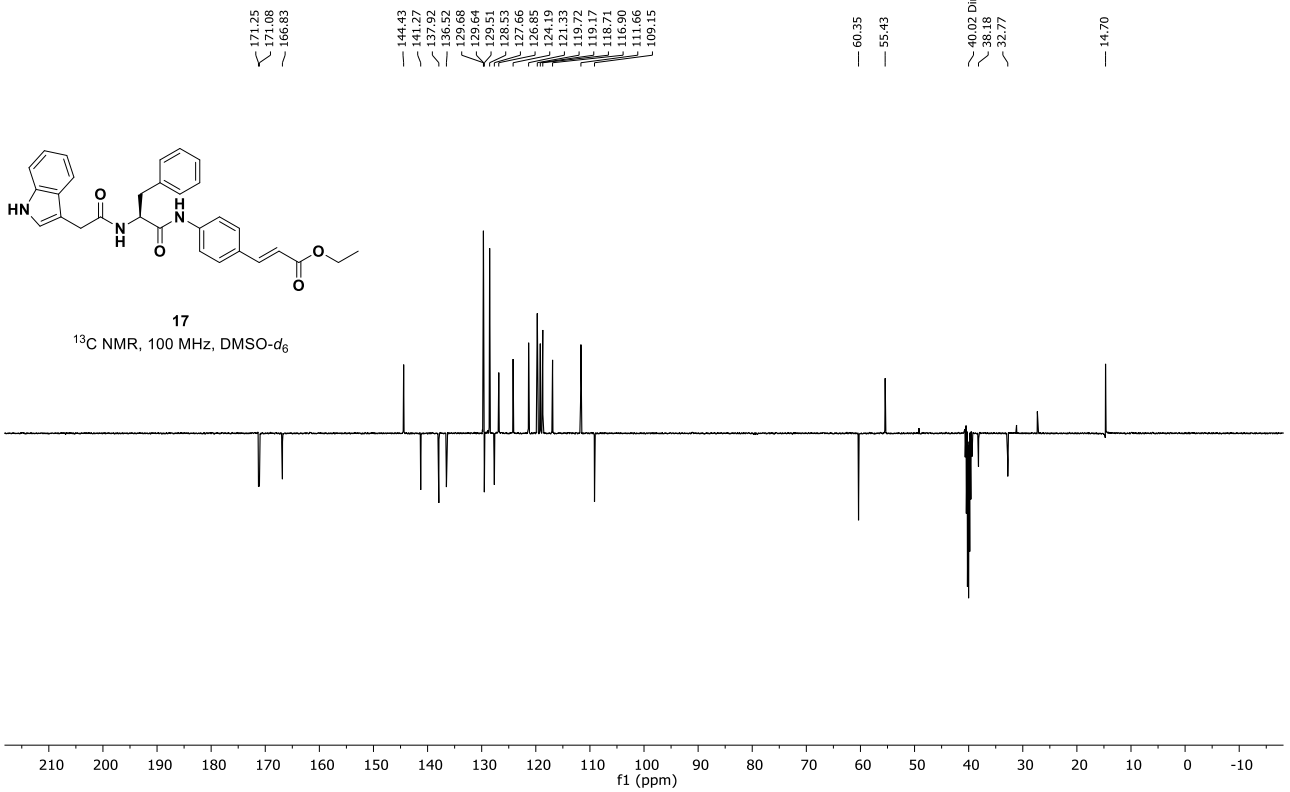

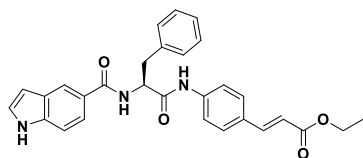

18

<sup>1</sup>H NMR, 400 MHz, DMSO-*d*<sub>6</sub>

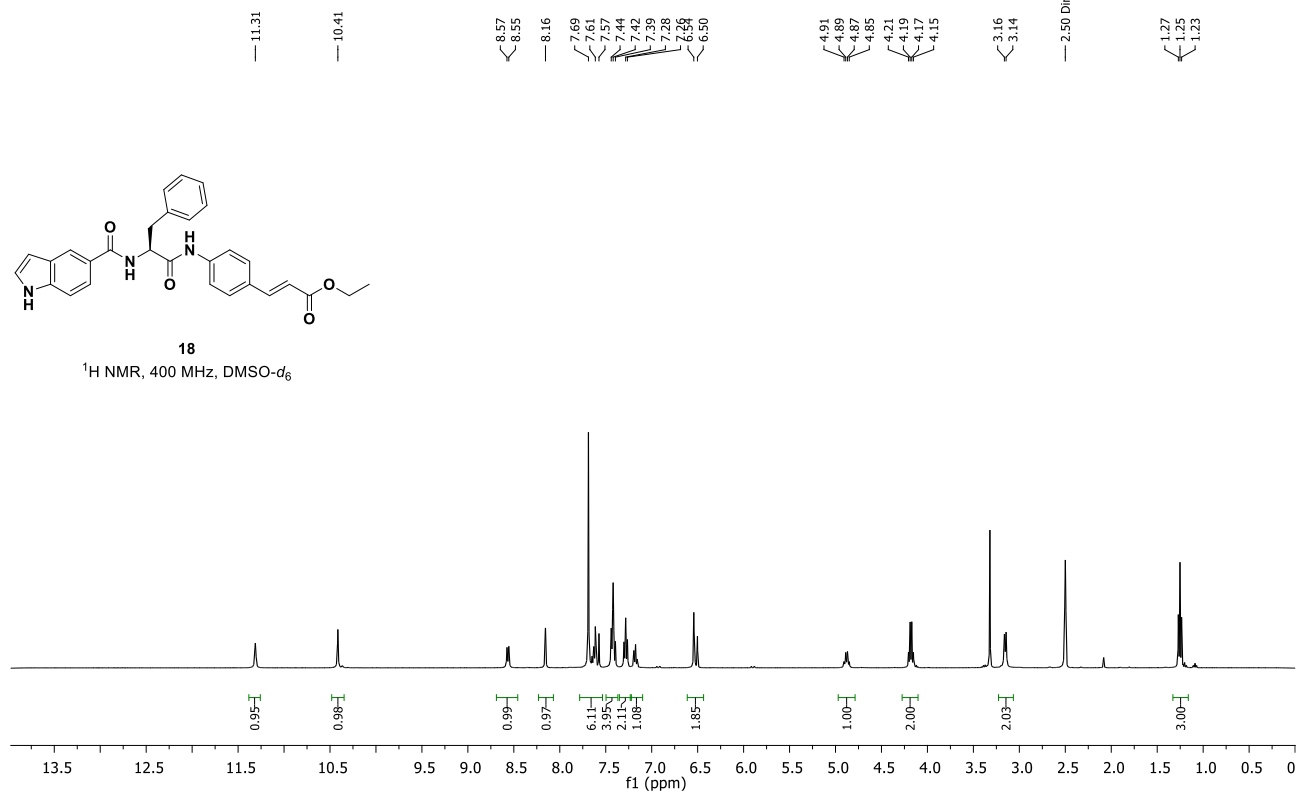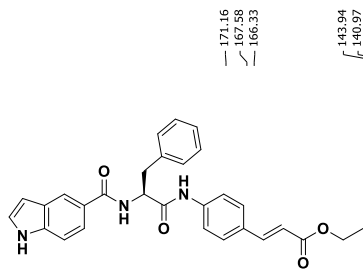

18

<sup>13</sup>C NMR, 100 MHz, DMSO-*d*<sub>6</sub>

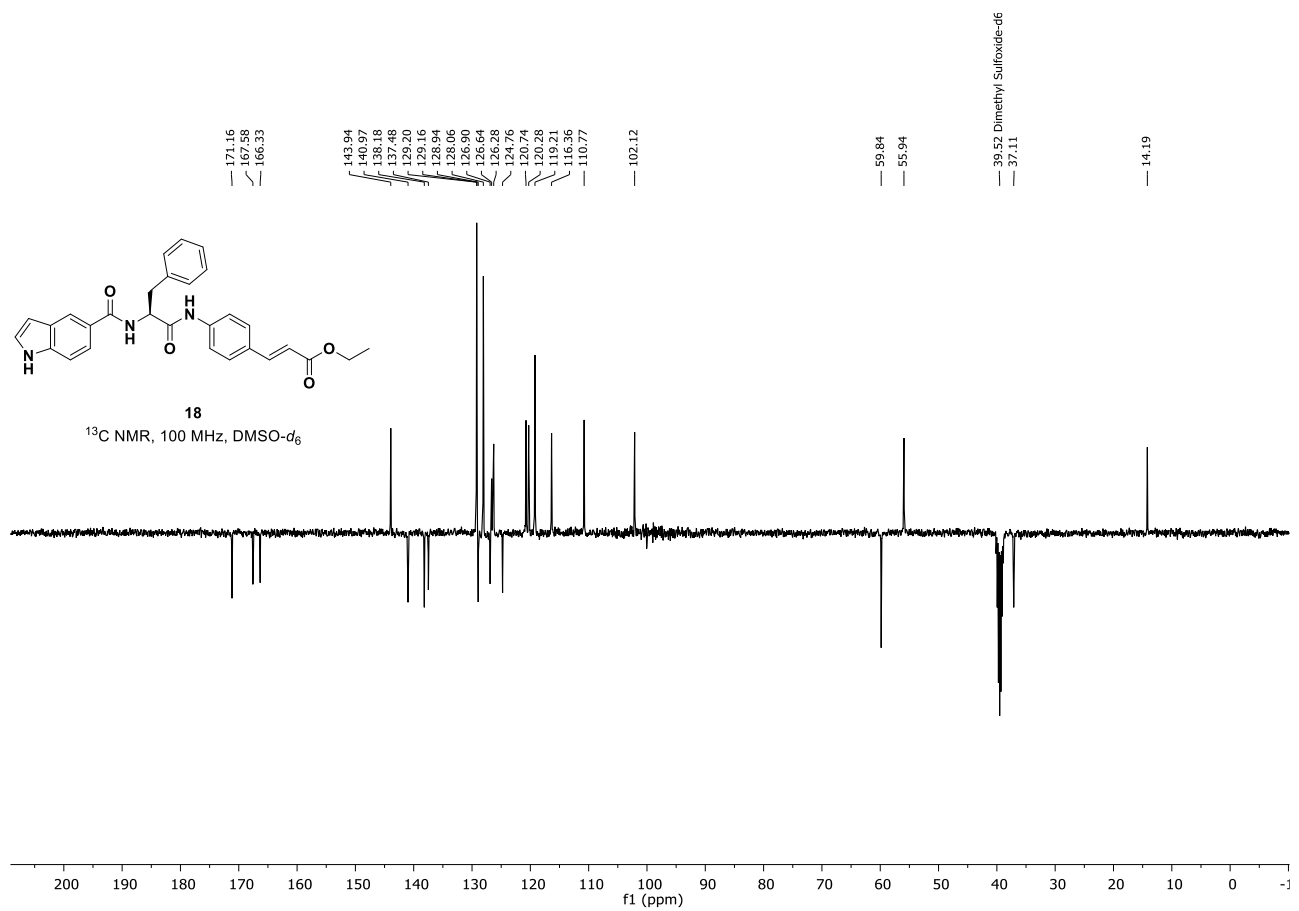

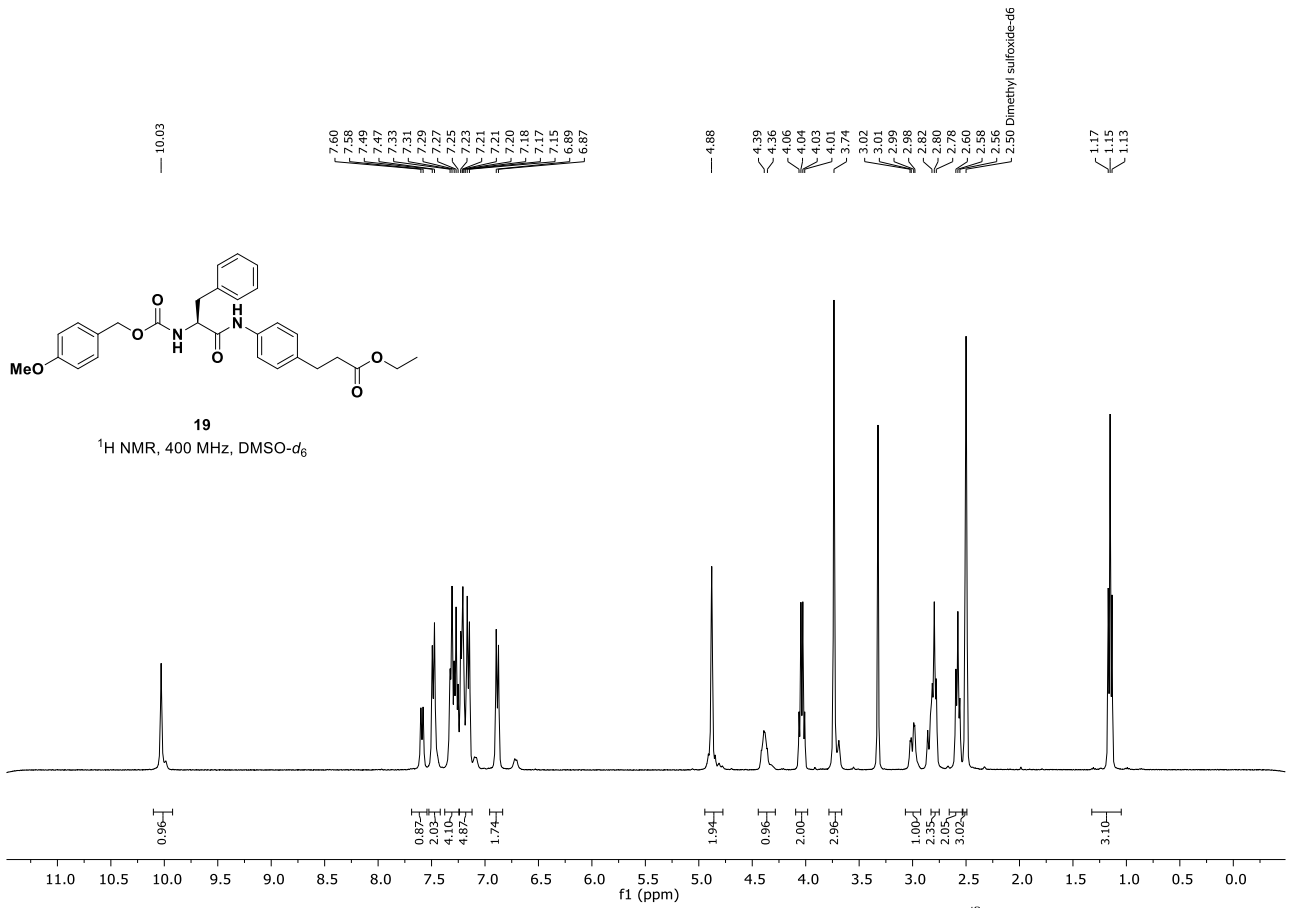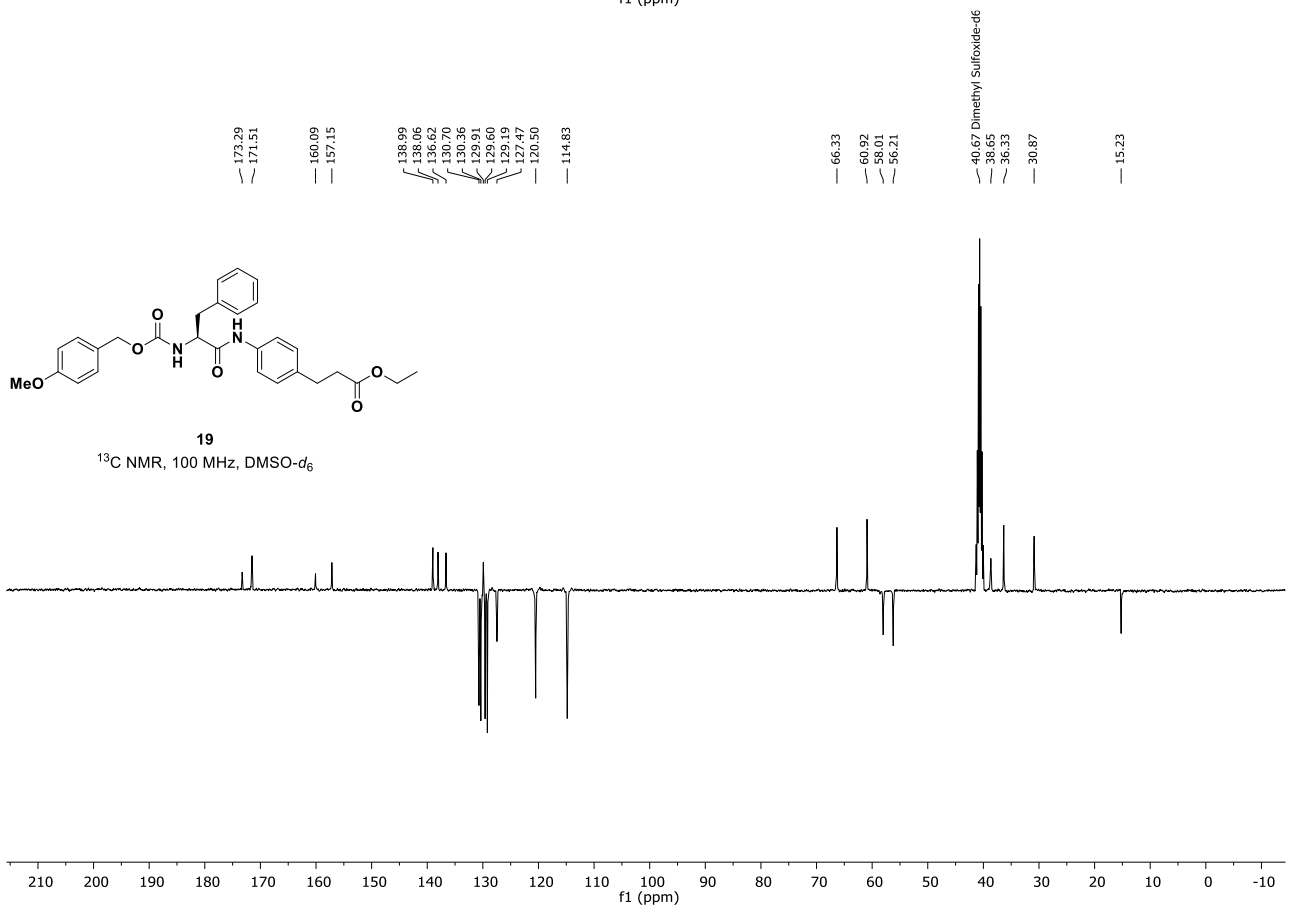

## 2. HPLC traces of the final compounds

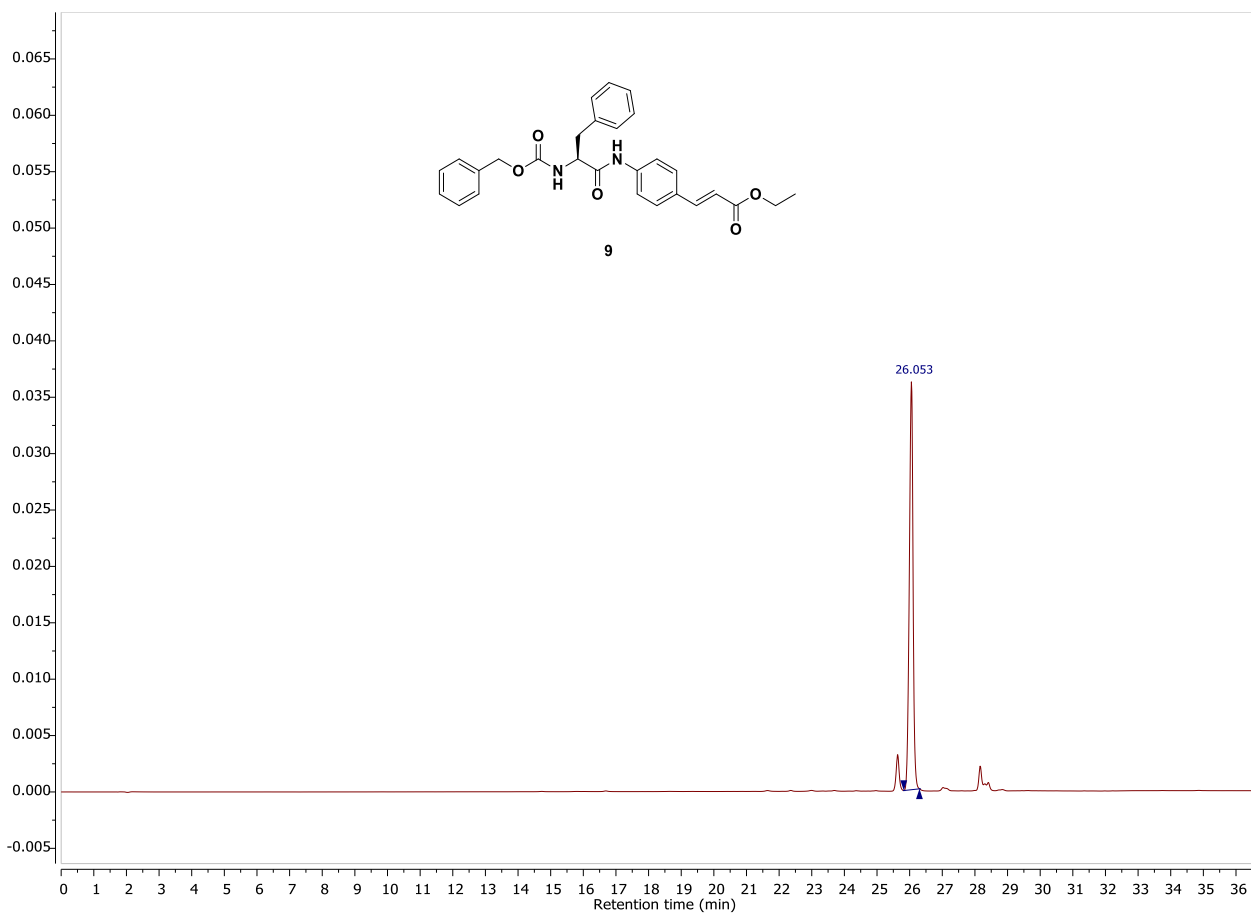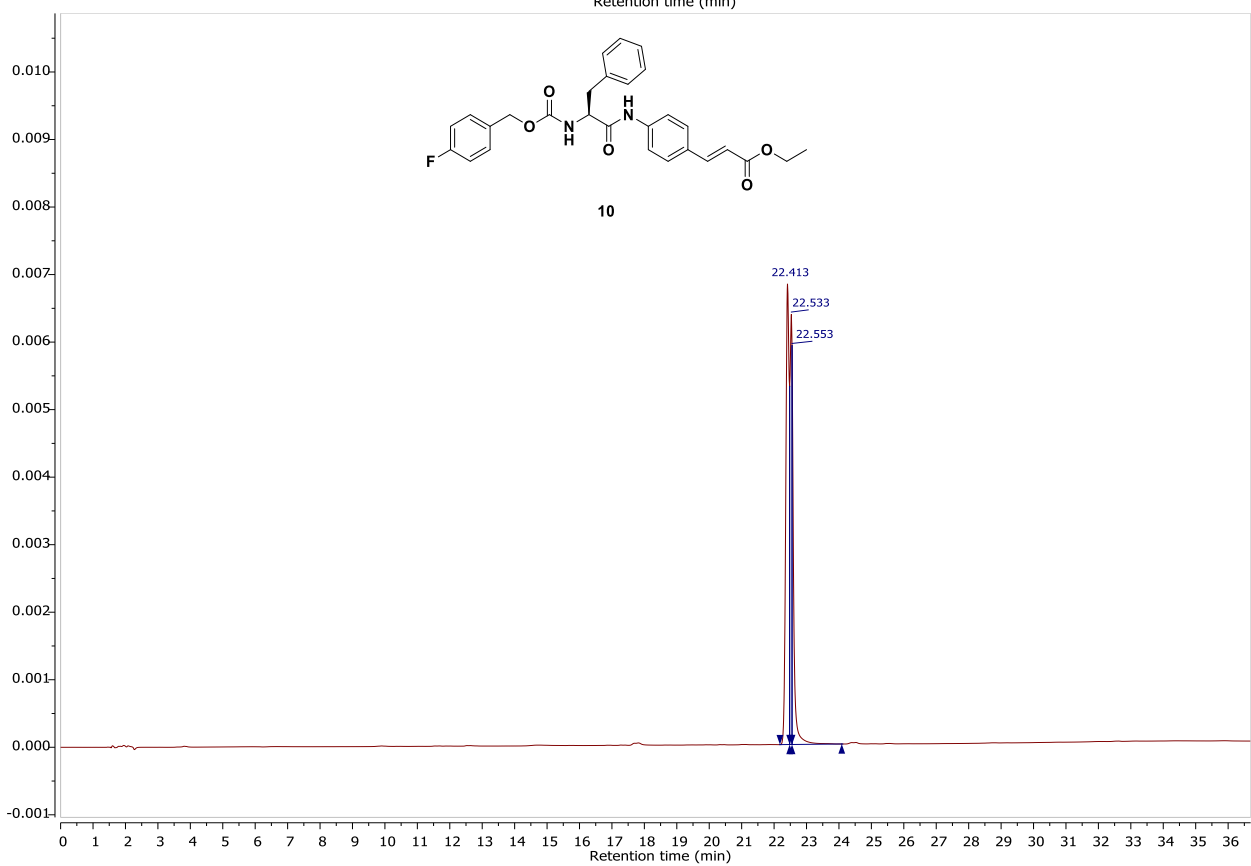



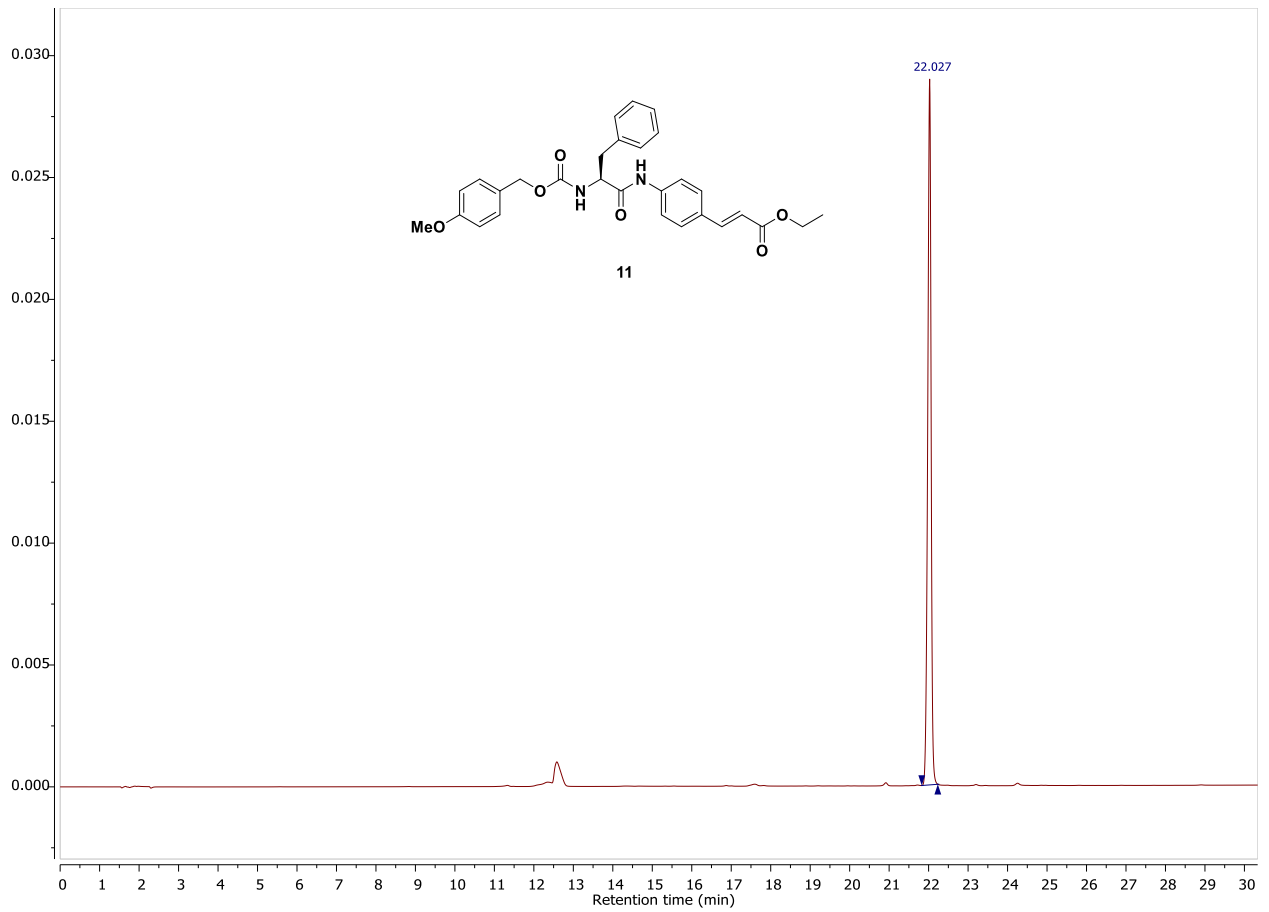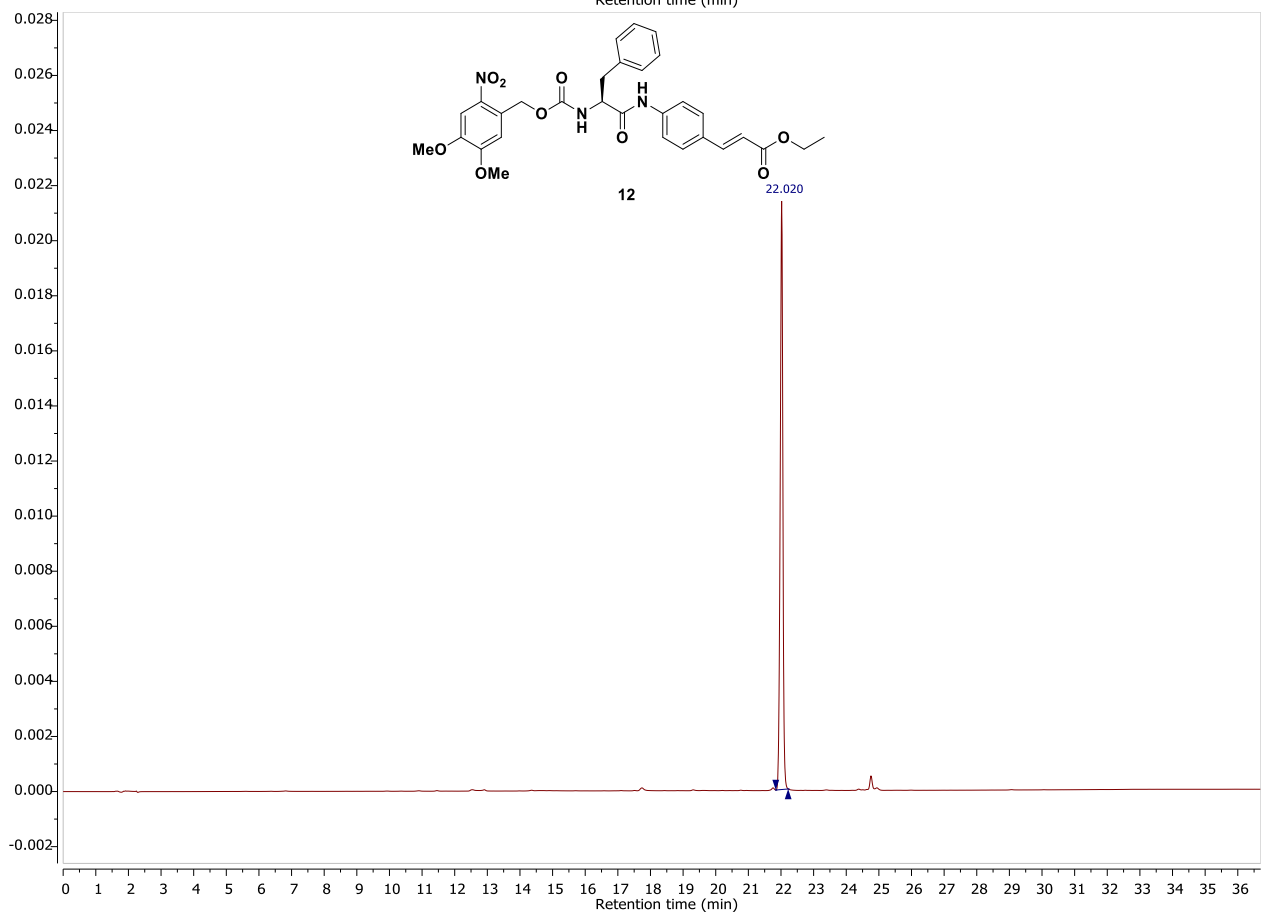

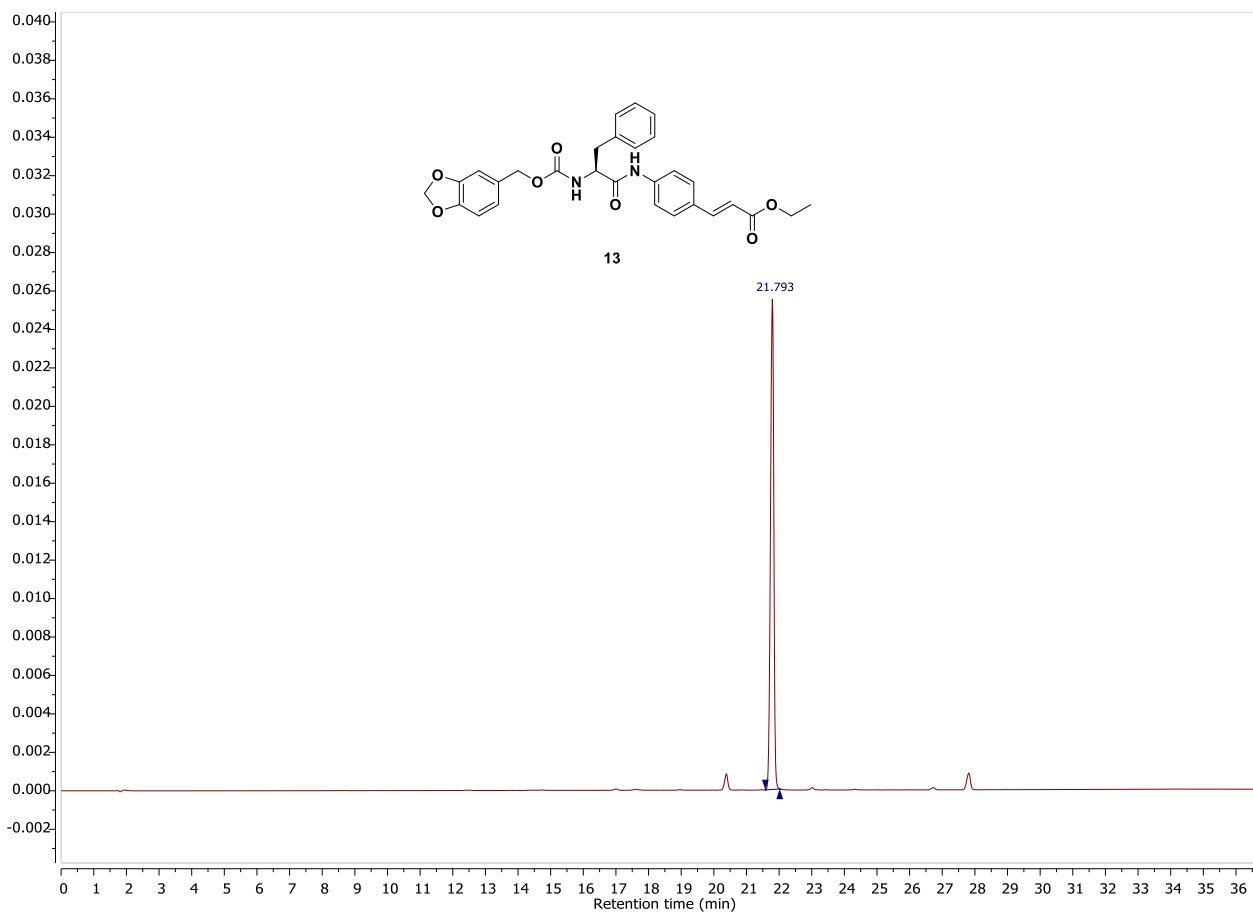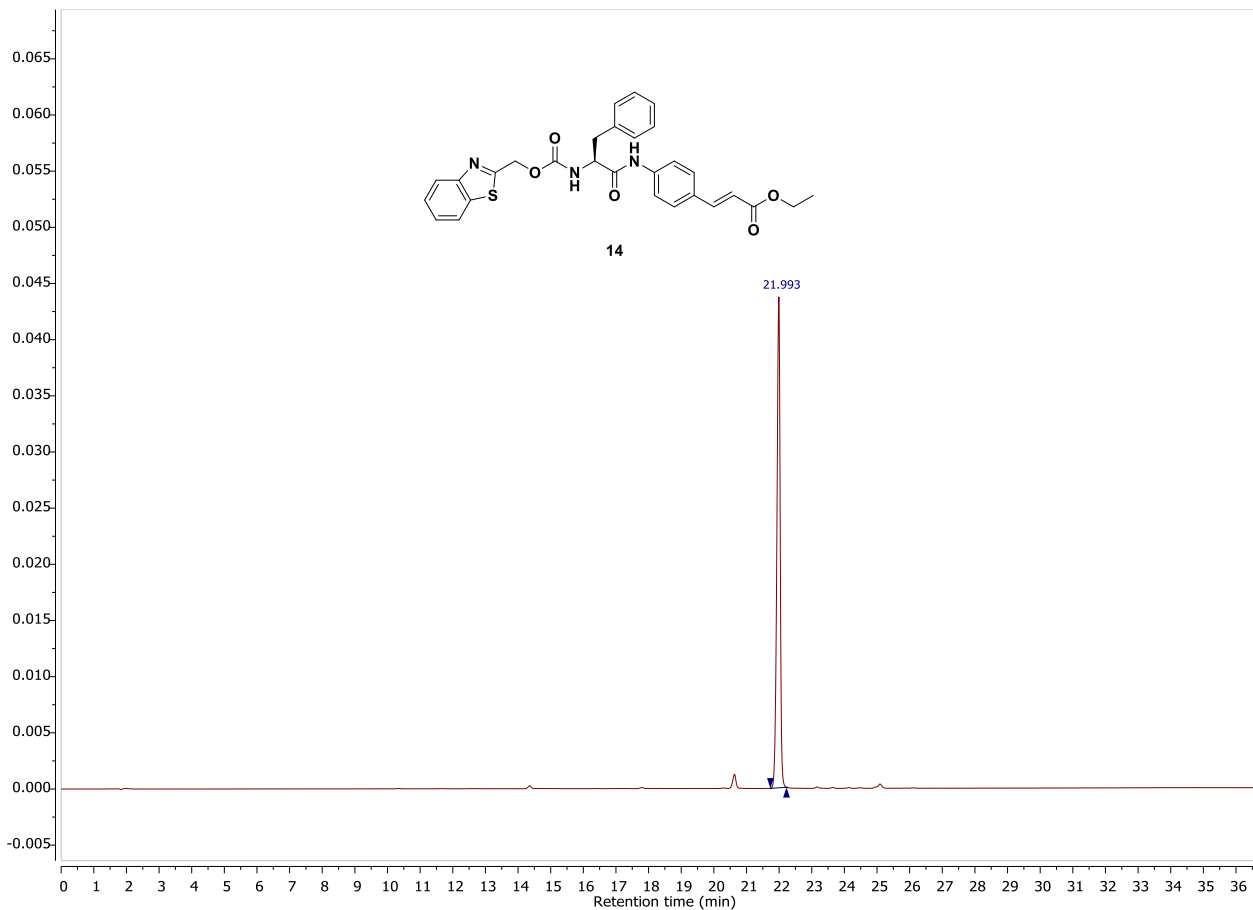

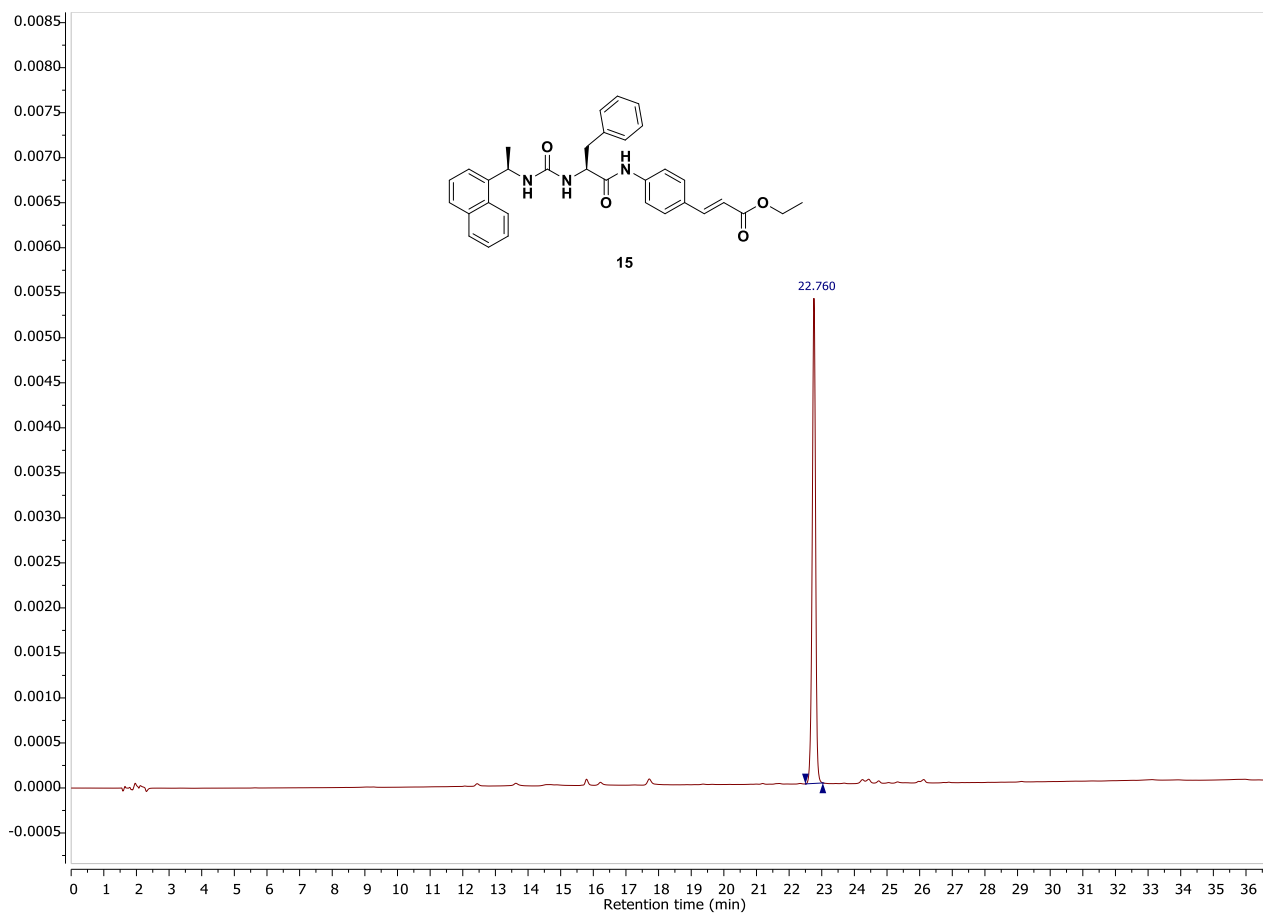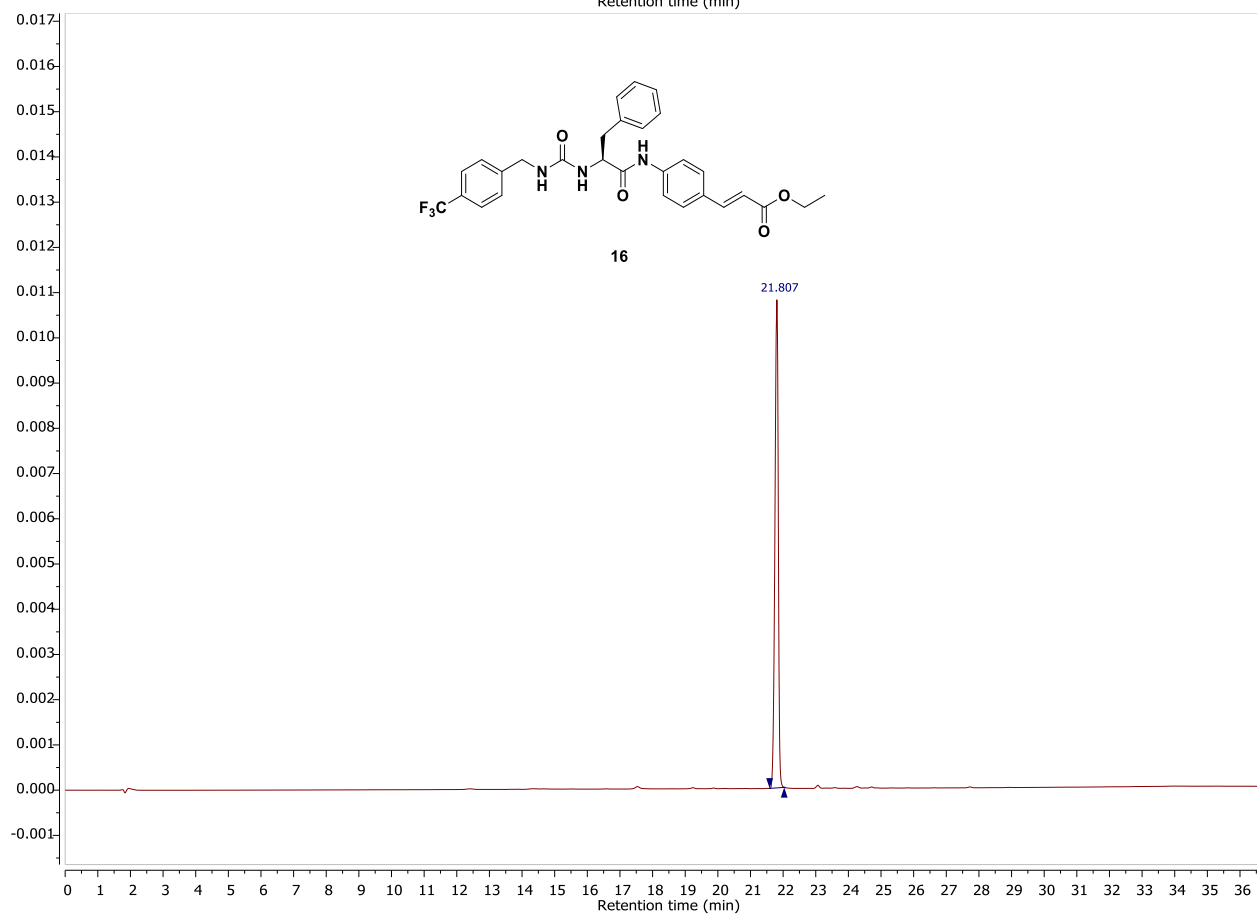

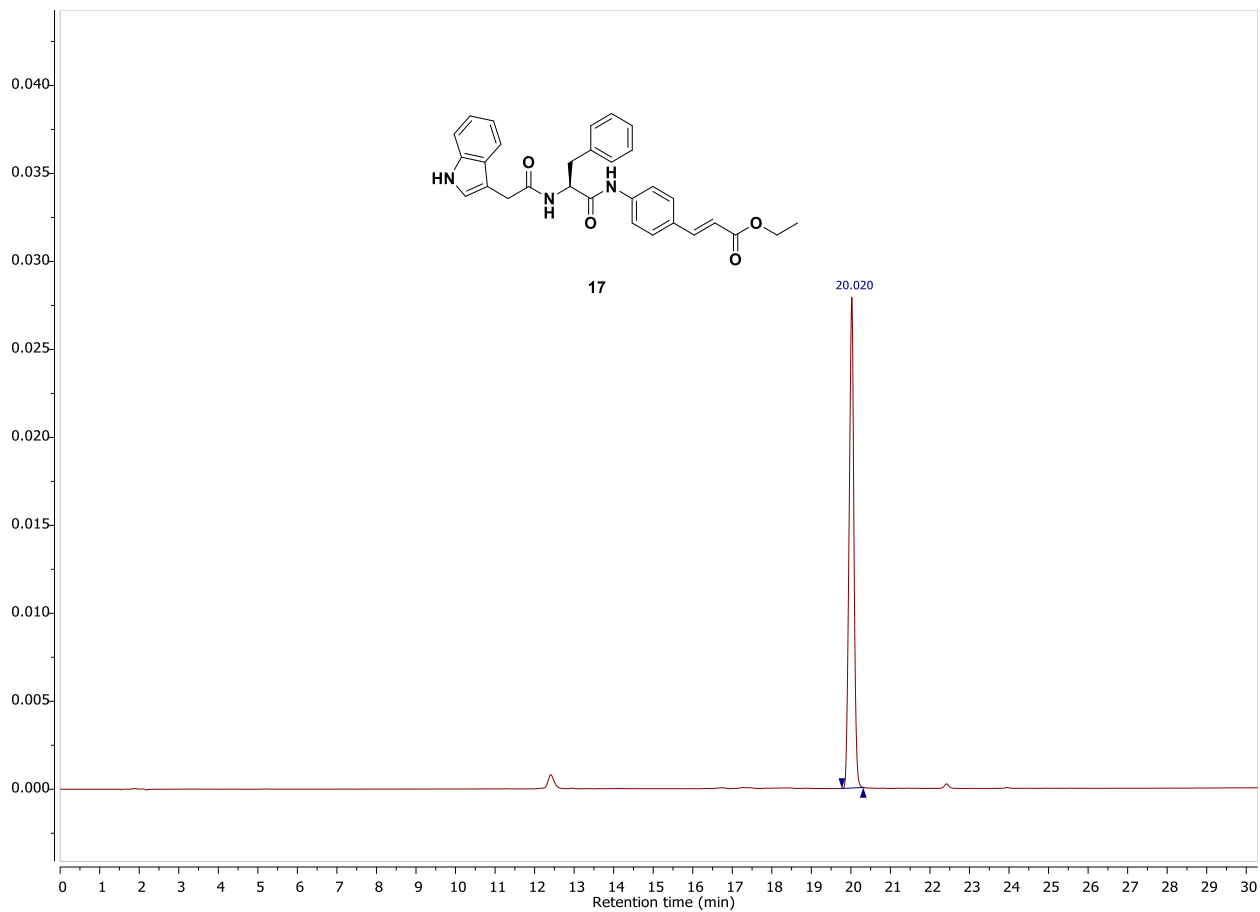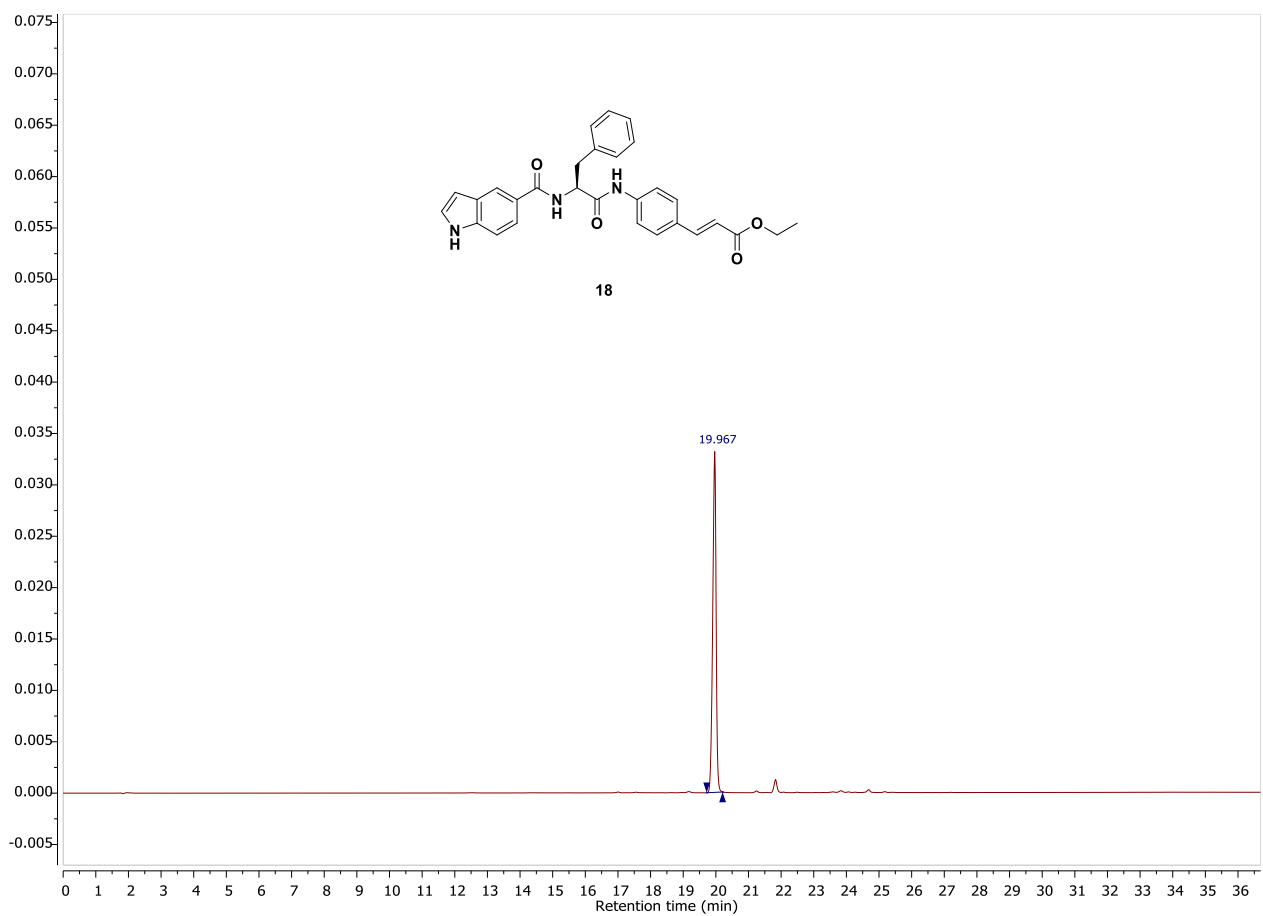

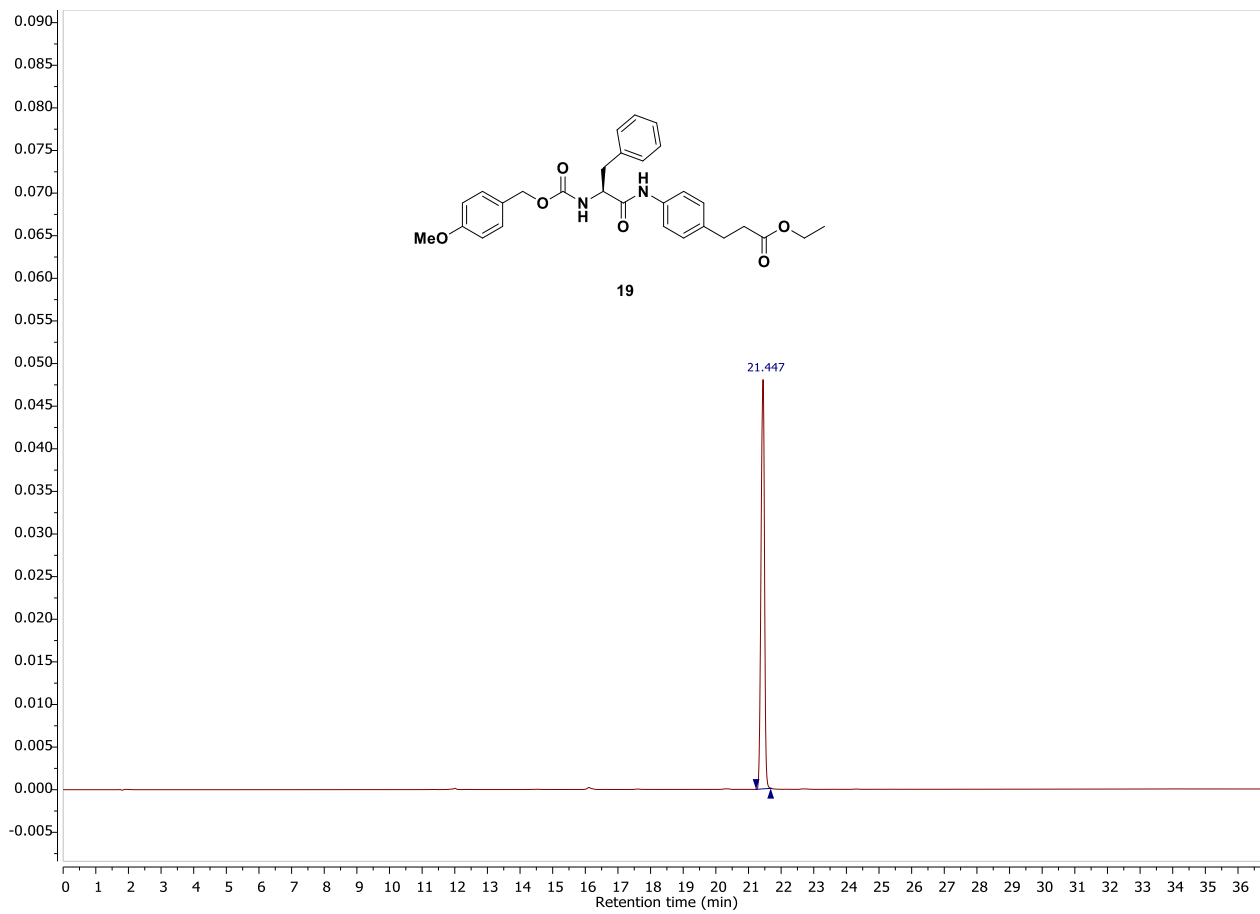

### 3. Figure S1

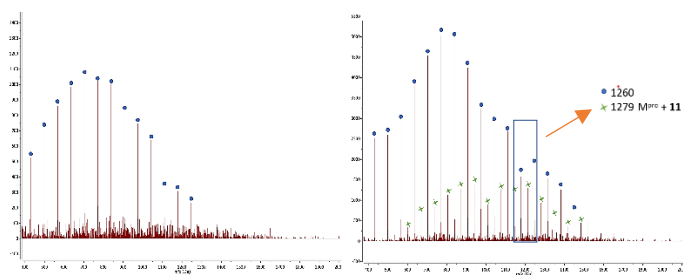

**Figure S1.** (A) Representative ESI-MS spectrum of a solution containing 0.4  $\mu$ M SARS-CoV-2 M<sup>pro</sup> in water/MeOH (1:1) with 0.1% HCOOH. The spectrum was acquired in positive ion mode. The blue dots correspond to the unmodified protein. (B) Representative ESI-MS spectrum of a mixture containing 0.4 mM SARS-CoV-2 M<sup>pro</sup> after incubation with **11** in water/MeOH (1:1) with 0.1% HCOOH. The spectrum was acquired in positive ion mode. The blue dots correspond to the unmodified protein, and the green stars correspond to the modified protein.

#### 4. Figure S2

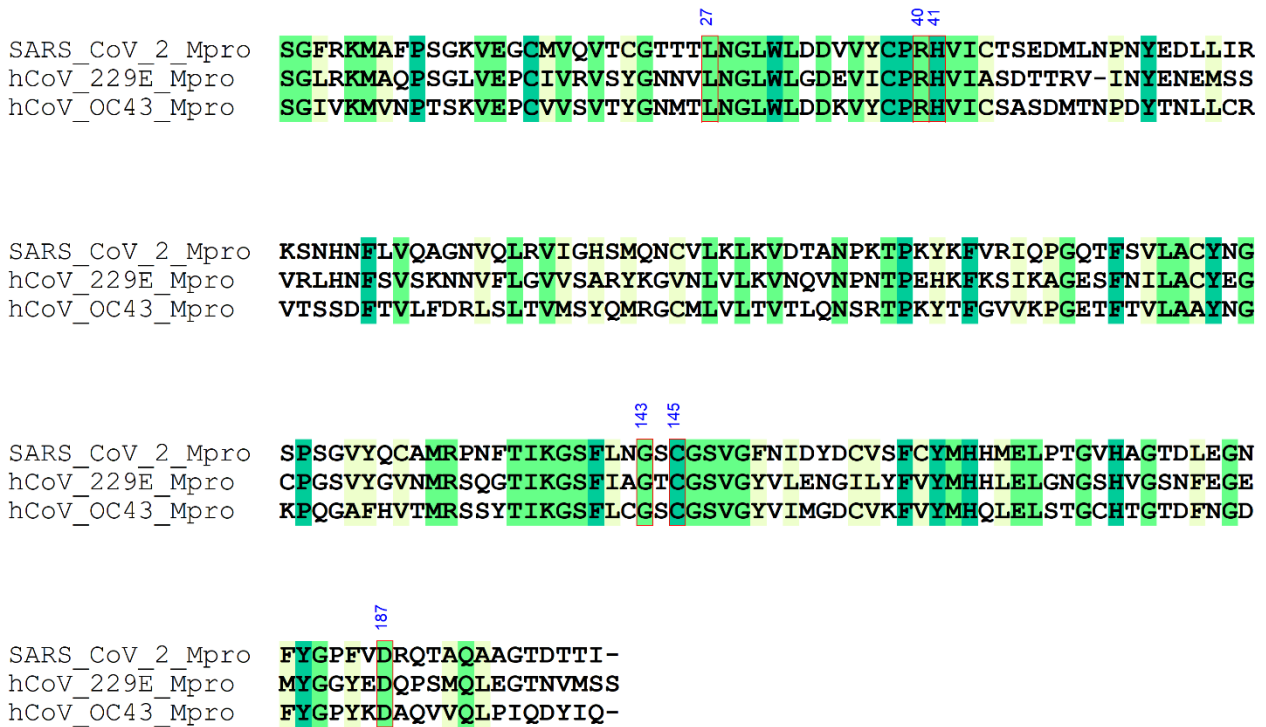

**Figure S2.** Sequence alignment of SARS-CoV-2 M<sup>pro</sup>, hCoV-229E M<sup>pro</sup>, and hCoV-OC43 M<sup>pro</sup>. Conserved residues are labeled in dark green, the same residues are indicated in lighter green, and residues with similar properties are yellow. The key residues are highlighted by a red square and the number of sequence positions in navy blue.

**Table S1.** Antiviral activity of cinnamic esters against hCoV-229E and hCoV-OC43. Notes: EC<sub>50</sub> was measured for hCoV-229E by evaluating the residual MRC-5 cell viability as a surrogate of viral CPE, or by focus forming reduction assay (FFRA) against hCoV-OC43 in HCT-8 cells.

| <b>Compound</b> | <b>hCoV-229E<br/>EC<sub>50</sub> (μM)</b> | <b>hCoV-OC43<br/>EC<sub>50</sub> (μM)</b> |
|-----------------|-------------------------------------------|-------------------------------------------|
| <b>11</b>       | > 50                                      | > 50                                      |
| <b>12</b>       | 5.27 ± 0.25                               | > 50                                      |
| <b>13</b>       | > 50                                      | > 50                                      |
| <b>15</b>       | > 50                                      | > 50                                      |
| <b>17</b>       | > 50                                      | 9.14 ± 0.70                               |
| <b>18</b>       | > 50                                      | 10.1 ± 0.17                               |
| <b>19</b>       | > 50                                      | > 50                                      |
